# Supplementary material
Source: PubMed Central journal article supplement (PMC2765553)
Supplement: NIHMS108674-supplement-1_si_001.pdf [file NIHMS108674-supplement-1_si_001.pdf]

# Supporting Information

## Synthesis of an $\alpha$ -Helix Mimetic Library Targeting Protein–Protein Interactions

Alex Shaginian,<sup>†</sup> Landon R. Whitby,<sup>†</sup> Sukwon Hong,<sup>†</sup> Inkyu Hwang,<sup>†</sup> Bilal Farooqi,<sup>‡</sup>  
Mark Searcey,<sup>§</sup> Jiandong Chen,<sup>‡</sup> Peter K. Vogt,<sup>†</sup> and Dale L. Boger<sup>\*†</sup>

*Contribution from the Department of Chemistry and The Skaggs Institute for Chemical Biology, The Scripps Research Institute, 10550 North Torrey Pines Road, La Jolla, California 92037 and Molecular Oncology Program, H. Lee Moffitt Cancer Center and Research Institute, University of South Florida, 12902 Magnolia Drive, Tampa, Florida 33612 and*

*School of Chemical Sciences and Pharmacy, University of East Anglia, Norwich, Norfolk, NR4 7TJ, UK*

### Experimental Section

**Sources** 1-Hydroxy-7-azabenzotriazole (HOAt) was obtained from CS Bio (Menlo Park, CA). Amino acids were obtained from Chem-Impex International (Wood Dale, IL). Sulfonyl chloride polystyrene resin was obtained from EMD Biosciences (San Diego, CA). All other reagents were obtained from Aldrich Chemical (Milwaukee, WI) or Acros Organics (Morris Plains, NJ) and used without further purification. Tetrahydrofuran (THF) was distilled from sodium benzophenone ketyl.

### General Procedure for the Preparation of the Aryl Monomers

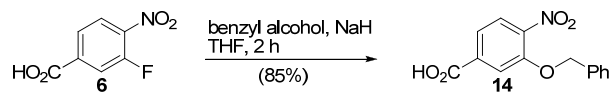

Sodium hydride (60%, 0.50 g, 12.4 mmol) was suspended in THF (10 mL) and benzyl alcohol (0.67 mL, 6.48 mmol) was added dropwise at 0 °C. The mixture was stirred at 0 °C for 15 min under an atmosphere of argon before fluoride **6** (1.0 g, 5.4 mmol) was added. The mixture was stirred at 0 °C for 5 min and room temperature for 2 h, quenched with saturated aqueous NH<sub>4</sub>Cl, diluted with EtOAc, and extracted with aqueous HCl (0.1 M, × 2). The organic layer was collected, concentrated, and the product purified by chromatography (SiO<sub>2</sub>, 3:2:0.1 hexanes/Et<sub>2</sub>O/HOAc) to give **14** as a solid (1.26 g, 85%). *R<sub>f</sub>* = 0.30 (1:1:0.04 hexanes/Et<sub>2</sub>O/HOAc); <sup>1</sup>H NMR (500 MHz, DMSO-*d*<sub>6</sub>, 25 °C) δ 13.66 (s, 1H), 7.99 (d, *J* = 8.0 Hz, 1H), 7.87 (s, 1H), 7.66 (d, *J* = 10.0 Hz, 1H), 7.41 (m, 5H), 5.39 (s, 2H); HRMS-ESI (*m/z*) calcd for [C<sub>14</sub>H<sub>11</sub>NO<sub>5</sub>+Na]<sup>+</sup> 296.0529; found: 296.0532.

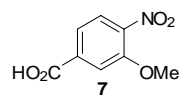

**7.** <sup>1</sup>H NMR (400 MHz, acetone-*d*<sub>6</sub>, 25 °C) δ 9.94 (s, 1H) 7.93 (d, *J* = 8.3 Hz, 1H), 7.89 (d, *J* = 1.4 Hz, 1H), 7.77 (dd, *J* = 8.3, 1.5 Hz, 1H), 4.08 (s, 3H); HRMS-ESI (*m/z*) calcd for [C<sub>8</sub>H<sub>7</sub>NO<sub>5</sub>+H]<sup>+</sup> 198.0397;

found: 198.0395.

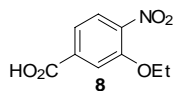

**8.**  $^1\text{H}$  NMR (400 MHz, acetone- $d_6$ , 25°C)  $\delta$  11.75 (s, 1H), 7.88 (d,  $J = 8.3$  Hz, 1H), 7.81 (d,  $J = 1.5$  Hz, 1H), 7.72 (dd,  $J = 8.3, 1.6$  Hz, 1H), 4.32 (q,  $J = 7.0$  Hz, 2H), 1.41 (t,  $J = 7.0$  Hz, 3H); HRMS-ESI ( $m/z$ ) calcd for  $[\text{C}_9\text{H}_9\text{NO}_5+\text{H}]^+$  212.0553; found: 212.0553.

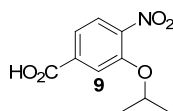

**9.**  $^1\text{H}$  NMR (400 MHz, acetone- $d_6$ , 25 °C)  $\delta$  9.71 (s, 1H), 7.85 (d,  $J = 8.0$  Hz, 1H), 7.84 (s, 1H), 7.71 (d,  $J = 8.0$  Hz, 1H), 4.92 (septet,  $J = 6.0$  Hz, 1H), 1.37 (d,  $J = 6.0$  Hz, 6H); HRMS-ESI ( $m/z$ ) calcd for  $[\text{C}_{10}\text{H}_{11}\text{NO}_5+\text{Na}]^+$  248.0529; found: 248.0528.

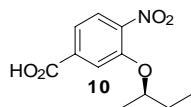

**10.**  $^1\text{H}$  NMR (400 MHz, acetone- $d_6$ , 25 °C)  $\delta$  11.76 (s, 1H), 7.85 (d,  $J = 8.3$  Hz, 1H), 7.82 (d,  $J = 1.5$  Hz, 1H), 7.70 (dd,  $J = 8.3, 1.6$  Hz, 1H), 4.73 (sextet,  $J = 6.0$  Hz, 1H), 1.80-1.64 (m, 2H), 1.33 (d,  $J = 6.1$  Hz, 3H), 0.97 (t,  $J = 7.4$  Hz, 3H); HRMS-ESI ( $m/z$ ) calcd for  $[\text{C}_{11}\text{H}_{13}\text{NO}_5+\text{H}]^+$  240.0866; found: 240.0873.

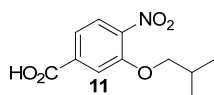

**11.**  $^1\text{H}$  NMR (400 MHz, acetone- $d_6$ , 25 °C)  $\delta$  10.80 (s, 1H), 7.92 (d,  $J = 8.3$  Hz, 1H), 7.83 (d,  $J = 1.5$  Hz, 1H), 7.74 (dd,  $J = 8.3, 1.6$  Hz, 1H), 4.07 (d,  $J = 6.4$  Hz, 2H), 2.13 (septet,  $J = 6.6$  Hz, 1H), 1.06 (d,  $J = 6.7$  Hz, 6H); HRMS-ESI ( $m/z$ ) calcd for  $[\text{C}_{11}\text{H}_{13}\text{NO}_5-\text{H}]^-$  238.0721; found: 238.0720.

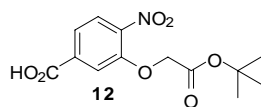

**12.**  $^1\text{H}$  NMR (400 MHz, acetone- $d_6$ , 25 °C)  $\delta$  11.82 (s, 1H), 7.92 (d,  $J = 8.3$  Hz, 1H), 7.77 (dd,  $J = 8.3, 1.4$  Hz, 1H), 7.73 (d,  $J = 1.5$  Hz, 1H), 4.92 (s, 2H), 1.43 (s, 9H); HRMS-ESI ( $m/z$ ) calcd for  $[\text{C}_{13}\text{H}_{15}\text{NO}_7+\text{Na}]^+$  320.0741; found: 320.0739.

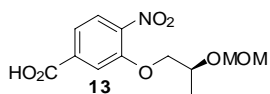

**13.**  $^1\text{H}$  NMR (400 MHz, acetone- $d_6$ , 25 °C)  $\delta$  11.82 (s, 1H), 7.93 (d,  $J = 8.3$  Hz, 1H), 7.87 (d,  $J = 1.5$

Hz, 1H), 7.76 (dd,  $J = 8.3, 1.6$  Hz, 1H), 4.70 (q,  $J = 6.8$  Hz, 2H), 4.27 (d,  $J = 5.2$  Hz, 2H), 4.17-4.08 (m, 1H), 3.32 (s, 3H), 1.30 (d,  $J = 6.4$  Hz, 3H); HRMS-ESI ( $m/z$ ) calcd for  $[C_{12}H_{15}NO_7+Na]^+$  308.0741; found: 308.0740.

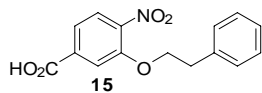

15.  $^1H$  NMR (400 MHz, acetone- $d_6$ , 25 °C)  $\delta$  11.78 (s, 1H), 7.90 (d,  $J = 8.3$  Hz, 1H), 7.84 (d,  $J = 1.5$  Hz, 1H), 7.74 (dd,  $J = 8.3, 1.6$  Hz, 1H), 7.40-7.19 (m, 5H), 4.50 (t,  $J = 6.6$  Hz, 2H), 3.15 (t,  $J = 6.6$  Hz, 2H); HRMS-ESI ( $m/z$ ) calcd for  $[C_{15}H_{13}NO_5+H]^+$  288.0866; found: 288.0864.

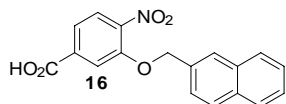

16.  $^1H$  NMR (400 MHz, DMSO- $d_6$ , 25 °C)  $\delta$  13.63 (s, 1H), 8.03-7.89 (m, 6H), 7.67 (dd,  $J = 8.3, 1.4$  Hz, 1H), 7.59 (dd,  $J = 8.5, 1.5$  Hz, 1H), 7.57-7.52 (m, 2H), 5.56 (s, 2H); HRMS-ESI ( $m/z$ ) calcd for  $[C_{19}H_{15}NO_5+H]^+$  338.1023; found: 337.1043.

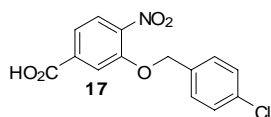

17.  $^1H$  NMR (400 MHz, acetone- $d_6$ , 25 °C)  $\delta$  11.84 (s, 1H), 7.98-7.94 (m, 2H), 7.79 (dd,  $J = 8.3, 1.5$  Hz, 1H), 7.57 (d,  $J = 8.4$  Hz, 2H), 7.49-7.44 (m, 2H), 5.45 (s, 2H); HRMS-ESI ( $m/z$ ) calcd for  $[C_{14}H_{10}ClNO_5+Na]^+$  330.014; found: 330.0137.

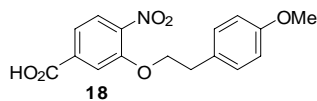

18.  $^1H$  NMR (400 MHz, acetone- $d_6$ , 25 °C)  $\delta$  11.78 (s, 1H), 7.91 (d,  $J = 8.4$  Hz, 1H), 7.83 (d,  $J = 1.5$  Hz, 1H), 7.73 (dd,  $J = 8.3, 1.5$  Hz, 1H), 7.27 (d,  $J = 8.6$  Hz, 2H), 6.87 (d,  $J = 8.7$  Hz, 2H), 4.44 (t,  $J = 6.7$  Hz, 2H), 3.76 (s, 3H), 3.08 (t,  $J = 6.6$  Hz, 2H); HRMS-ESI ( $m/z$ ) calcd for  $[C_{16}H_{15}NO_6+Na]^+$  340.0792; found: 340.0789.

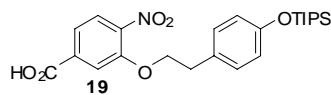

19.  $^1H$  NMR (400 MHz, acetone- $d_6$ , 25 °C)  $\delta$  11.78 (s, 1H), 7.90 (d,  $J = 8.3$  Hz, 1H), 7.83 (d,  $J = 1.52$  Hz, 1H), 7.73 (dd,  $J = 8.3, 1.6$  Hz, 1H), 7.24 (d,  $J = 8.5$  Hz, 2H), 6.86 (d,  $J = 8.5$  Hz, 2H), 4.45 (t,  $J = 6.7$  Hz, 2H), 3.08 (t,  $J = 6.7$  Hz, 2H), 1.34-1.22 (m, 3H), 1.11 (d,  $J = 7.2$  Hz, 18H); HRMS-ESI ( $m/z$ ) calcd for  $[C_{24}H_{33}NO_6Si+Na]^+$  482.1969; found: 482.1964.

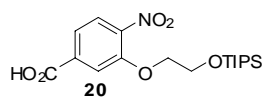

**20.**  $^1\text{H}$  NMR (400 MHz, acetone- $d_6$ , 25 °C)  $\delta$  11.79 (s, 1H), 7.94 (d,  $J$  = 1.5 Hz, 1H), 7.89 (d,  $J$  = 8.3 Hz, 1H), 7.75 (dd,  $J$  = 8.3, 1.6 Hz, 1H), 4.43 (t,  $J$  = 4.6 Hz, 2H), 4.15 (t,  $J$  = 4.6 Hz, 2H), 1.24-0.95 (m, 21H); HRMS-ESI ( $m/z$ ) calcd for  $[\text{C}_{18}\text{H}_{29}\text{NO}_6\text{Si}+\text{H}]^+$  384.1837; found: 384.1838.

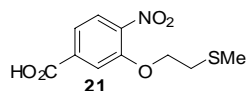

**21.**  $^1\text{H}$  NMR (400 MHz, acetone- $d_6$ , 25 °C)  $\delta$  11.81 (s, 1H), 7.92 (d,  $J$  = 8.3 Hz, 1H), 7.88 (d,  $J$  = 1.5 Hz, 1H), 7.77 (dd,  $J$  = 8.3, 1.6 Hz, 1H), 4.49 (t,  $J$  = 6.6 Hz, 2H), 2.94 (t,  $J$  = 6.5 Hz, 2H), 2.21 (s, 3H); HRMS-ESI ( $m/z$ ) calcd for  $[\text{C}_{10}\text{H}_{11}\text{NO}_5\text{S}+\text{Na}]^+$  280.025; found: 280.0253.

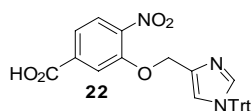

**22.**  $^1\text{H}$  NMR (400 MHz, DMSO- $d_6$ , 25 °C)  $\delta$  13.58 (s, 1H), 7.99 (s, 1H), 7.93-7.87 (m, 2H), 7.62 (d,  $J$  = 8.4 Hz, 1H), 7.40-7.33 (m, 10H), 7.23 (s, 1H), 7.08-7.00 (m, 6H), 5.28 (s, 2H); HRMS-ESI ( $m/z$ ) calcd for  $[\text{C}_{30}\text{H}_{23}\text{N}_3\text{O}_5+\text{H}]^+$  506.1710; found: 506.1705.

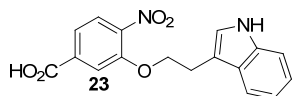

**23.**  $^1\text{H}$  NMR (600 MHz, DMSO- $d_6$ , 25 °C)  $\delta$  10.91 (s, 1H), 7.92 (d,  $J$  = 8.4 Hz, 1H), 7.77 (s, 1H), 7.60 (t,  $J$  = 9.0 Hz, 2H), 7.34 (d,  $J$  = 7.8 Hz, 1H), 7.23 (s, 1H), 7.07 (t,  $J$  = 7.2 Hz, 1H), 6.98 (t,  $J$  = 7.2 Hz, 1H), 4.44 (t,  $J$  = 6.6 Hz, 2H), 3.17 (t,  $J$  = 6.0 Hz, 2H); HRMS-MALDI ( $m/z$ ) calcd for  $[\text{C}_{17}\text{H}_{14}\text{N}_2\text{O}_5+\text{Na}]^+$  349.0795; found: 349.0787.

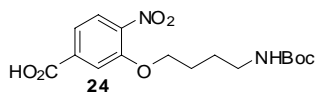

**24.**  $^1\text{H}$  NMR (400 MHz, acetone- $d_6$ , 25 °C)  $\delta$  11.78 (s, 1H), 7.88 (d,  $J$  = 8.3 Hz, 1H), 7.81 (d,  $J$  = 1.4 Hz, 1H), 7.71 (dd,  $J$  = 8.3, 1.6 Hz, 1H), 5.97 (s, 1H), 4.29 (t,  $J$  = 6.3 Hz, 2H), 3.12 (q,  $J$  = 6.7 Hz, 2H), 1.88-1.80 (m, 2H), 1.70-1.61 (m, 2H), 1.36 (s, 9H); HRMS-ESI ( $m/z$ ) calcd for  $[\text{C}_{16}\text{H}_{22}\text{N}_2\text{O}_7+\text{H}]^+$  355.15; found: 355.1500.

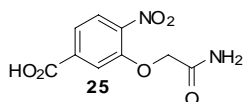

**25.**  $^1\text{H}$  NMR (400 MHz, DMSO- $d_6$ , 25 °C)  $\delta$  13.65 (s, 1H), 8.00 (d,  $J$  = 8.2 Hz, 1H), 7.69-7.63 (m, 2H), 7.47 (d,  $J$  = 6.1 Hz, 2H), 4.76 (s, 2H); HRMS-ESI ( $m/z$ ) calcd for  $[\text{C}_9\text{H}_8\text{N}_2\text{O}_6+\text{H}]^+$  241.0455; found: 241.0453.

## General Procedure for the Preparation of Dimers

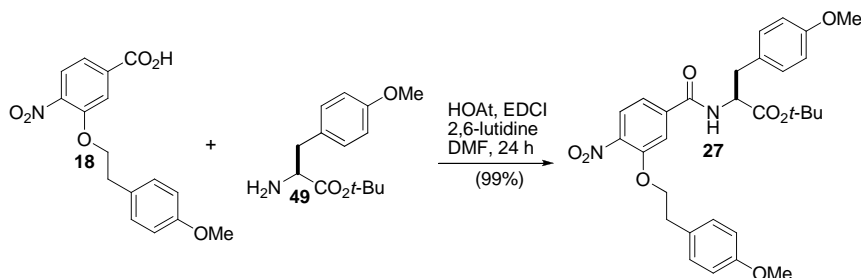

**27.** Monomer **18** (95 mg, 0.30 mmol) was combined with amine **49** (88 mg, 0.35 mmol) in DMF (0.75 mL) in a 0.5 dram vial. HOAt (61 mg, 0.45 mmol), EDCI (69 mg, 0.36 mmol), and 2,6-lutidine (0.17 mL, 1.5 mmol) were added. The mixture was agitated on a titer plate shaker for 24 h, diluted with EtOAc/Et<sub>2</sub>O, extracted with aqueous HCl (0.1 M, × 2) and saturated aqueous NaHCO<sub>3</sub> (× 1). The organic layer was collected, dried (Na<sub>2</sub>SO<sub>4</sub>), and concentrated to give **27** as a solid (163 mg, 99%) that was homogeneous by TLC analysis.  $R_f = 0.33$  (7:3 hexanes/EtOAc); <sup>1</sup>H NMR (300 MHz, CDCl<sub>3</sub>, 25 °C) δ 7.67 (d,  $J = 8.3$  Hz, 1H), 7.38 (d,  $J = 1.4$  Hz, 1H), 7.14 (m, 6H), 6.82 (m, 4H), 4.87 (q,  $J = 6.2$  Hz, 1H), 4.18 (t,  $J = 6.7$  Hz, 2H), 3.75 (s, 3H), 3.73 (s, 3H), 3.20 (dd,  $J = 6.1, 14.0$  Hz, 1H), 3.10 (dd,  $J = 6.3, 14.0$  Hz, 1H), 3.02 (t,  $J = 6.5$  Hz, 2H), 1.47 (s, 9H); <sup>13</sup>C NMR (75 MHz, CDCl<sub>3</sub>, 25 °C) δ 170.9, 164.5, 158.5, 158.2, 151.8, 141.0, 138.7, 130.2, 130.0, 129.3, 127.7, 125.2, 117.7, 113.7, 113.4, 82.6, 70.5, 55.0, 54.3, 36.6, 34.3, 27.8; HRMS-ESI ( $m/z$ ) calcd for [C<sub>30</sub>H<sub>34</sub>N<sub>2</sub>O<sub>8</sub>+H]<sup>+</sup> 551.2388; found: 551.2382.

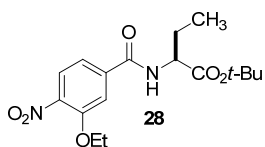

**28.** The product was obtained as a solid (96%) that was homogeneous by TLC analysis.  $R_f = 0.25$  (4:1 hexanes/EtOAc); <sup>1</sup>H NMR (300 MHz, CDCl<sub>3</sub>, 25 °C) δ 7.75 (d,  $J = 8.3$  Hz, 1H), 7.52 (s, 1H), 7.33 (d,  $J = 8.3$  Hz, 1H), 7.25 (d,  $J = 7.4$  Hz, 1H), 4.64 (m, 1H), 4.19 (q,  $J = 6.8$  Hz, 2H), 2.01 (m, 1H), 1.82 (m, 1H), 1.52 (s, 9H), 1.46 (t,  $J = 7.0$  Hz, 3H), 0.99 (t,  $J = 7.4$  Hz, 3H); <sup>13</sup>C NMR (75 MHz, CDCl<sub>3</sub>, 25 °C) δ 172.1, 164.8, 152.0, 141.4, 138.6, 125.2, 117.7, 113.8, 82.6, 65.5, 54.4, 27.9, 25.4, 14.4, 9.5; HRMS-ESI ( $m/z$ ) calcd for [C<sub>17</sub>H<sub>24</sub>N<sub>2</sub>O<sub>6</sub>+H]<sup>+</sup> 353.1707; found: 353.1708.

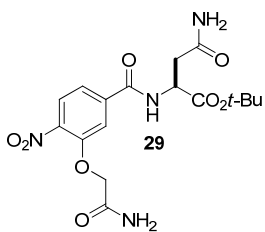

**29.** The product was obtained as a solid (77%) that was homogeneous by TLC analysis.  $R_f = 0.33$  (10:1

CH<sub>2</sub>Cl<sub>2</sub>/MeOH); <sup>1</sup>H NMR (300 MHz, CD<sub>3</sub>OD, 25 °C) δ 8.02 (d, *J* = 8.4 Hz, 1H), 7.68 (d, *J* = 1.6 Hz, 1H), 7.58 (dd, *J* = 1.6, 8.4 Hz, 1H), 4.83 (dd, *J* = 5.7, 7.1 Hz, 1H), 4.78 (s, 2H), 2.85 (m, 2H), 1.48 (s, 9H); <sup>13</sup>C NMR (75 MHz, CD<sub>3</sub>OD, 25 °C) δ 174.9, 172.3, 171.4, 167.5, 152.1, 142.6, 141.0, 127.2, 121.6, 115.7, 83.4, 69.0, 52.2, 37.5, 28.2; HRMS-ESI (*m/z*) calcd for [C<sub>17</sub>H<sub>22</sub>N<sub>4</sub>O<sub>8</sub>+H]<sup>+</sup> 411.1510; found: 411.1505.

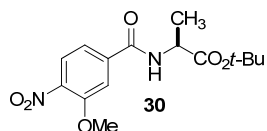

**30.** The product was obtained as a solid (95%) that was homogeneous by TLC analysis. *R<sub>f</sub>* = 0.36 (3:2 hexanes/EtOAc); <sup>1</sup>H NMR (300 MHz, CDCl<sub>3</sub>, 25 °C) δ 7.80 (d, *J* = 8.3 Hz, 1H), 7.56 (d, *J* = 1.5 Hz, 1H), 7.32 (dd, *J* = 1.6, 8.3 Hz, 1H), 7.10 (d, *J* = 7.0 Hz, 1H), 4.65 (p, *J* = 7.1 Hz, 1H), 3.97 (s, 3H), 1.49 (m, 12H); <sup>13</sup>C NMR (75 MHz, CDCl<sub>3</sub>, 25 °C) δ 172.8, 164.7, 153.1, 141.5, 139.3, 125.8, 118.2, 113.3, 83.0, 57.0, 49.5, 28.2, 18.7; HRMS-ESI (*m/z*) calcd for [C<sub>15</sub>H<sub>20</sub>N<sub>2</sub>O<sub>6</sub>+H]<sup>+</sup> 325.1394; found: 325.1391.

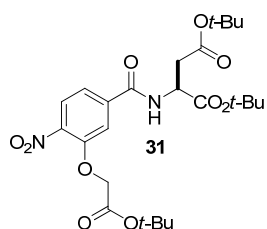

**31.** The product was obtained as a solid (95%) that was homogeneous by TLC analysis. *R<sub>f</sub>* = 0.35 (7:3 hexanes/EtOAc); <sup>1</sup>H NMR (300 MHz, CDCl<sub>3</sub>, 25 °C) δ 7.89 (d, *J* = 8.3 Hz, 1H), 7.52 (s, 1H), 7.41 (d, *J* = 8.4, 1H), 7.36 (d, *J* = 7.8 Hz, 1H), 4.84 (m, 1H), 4.74 (s, 2H), 2.99 (dd, *J* = 3.6, 17.1 Hz, 1H), 2.84 (dd, *J* = 3.7, 17.2 Hz, 1H), 1.47 (m, 27 H); <sup>13</sup>C NMR (75 MHz, CDCl<sub>3</sub>, 25 °C) δ 170.9, 164.9, 151.5, 142.4, 138.9, 125.3, 117.1, 115.2, 82.6, 77.6, 57.2, 38.3, 28.9, 28.0, 25.5, 18.9, 15.3, 11.7, 9.4; HRMS-ESI (*m/z*) calcd for [C<sub>25</sub>H<sub>36</sub>N<sub>2</sub>O<sub>10</sub>+H]<sup>+</sup> 525.2443; found: 525.2444.

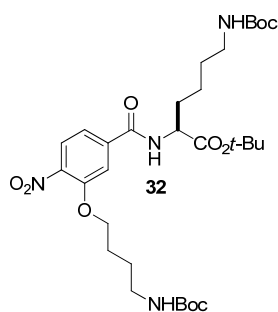

**32.** The product was obtained as a solid (100%) that was homogeneous by TLC analysis. *R<sub>f</sub>* = 0.37 (1:1 hexanes/EtOAc); <sup>1</sup>H NMR (300 MHz, CDCl<sub>3</sub>, 25 °C) δ 7.79 (d, *J* = 8.3 Hz, 1H), 7.56 (d, *J* = 1.1 Hz, 1H), 7.40 (d, *J* = 8.5 Hz, 1H), 7.35 (d, *J* = 7.4 Hz, 1H), 4.84 (t, *J* = 5.1 Hz, 1H), 4.75 (t, *J* = 5.5 Hz, 1H), 4.63 (q, *J* = 7.2 Hz, 1H), 4.16 (t, *J* = 6.0 Hz, 2H), 3.14 (m, 4H), 1.87 (m, 4H), 1.69 (m, 4H), 1.55 (m, 2H), 1.50 (s, 9H), 1.44 (s, 9H), 1.39 (s, 9 H); <sup>13</sup>C NMR (75 MHz, CDCl<sub>3</sub>, 25 °C) δ 171.7, 165.0, 156.0, 152.0, 141.2, 138.9, 125.3, 118.1, 113.8, 82.5, 78.9, 69.2, 53.3, 39.8, 31.6, 29.6, 28.3, 28.2, 27.9, 26.4, 26.0, 22.4; HRMS-ESI (*m/z*) calcd for [C<sub>31</sub>H<sub>50</sub>N<sub>4</sub>O<sub>10</sub>+H]<sup>+</sup> 639.3600; found: 639.3597.

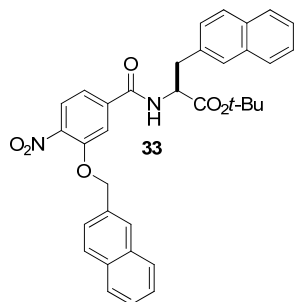

**33.** The product was obtained as a solid (100%) that was homogeneous by TLC analysis.  $R_f = 0.22$  (4:1 hexanes/EtOAc);  $^1\text{H NMR}$  (300 MHz,  $\text{CDCl}_3$ , 25 °C)  $\delta$  7.71 (m, 8 H), 7.62 (s, 1H), 7.49 (s, 1H), 7.41 (m, 5 H), 7.31 (d,  $J = 8.3$  Hz, 1H), 7.16 (d,  $J = 8.2$  Hz, 1H), 6.97 (d,  $J = 7.3$  Hz, 1H), 5.18 (m, 2 H), 5.01 (q,  $J = 6.0$  Hz, 1H), 3.38 (m, 2H), 1.45 (s, 9 H);  $^{13}\text{C NMR}$  (75 MHz,  $\text{CDCl}_3$ , 25 °C)  $\delta$  170.7, 164.6, 151.6, 141.5, 138.8, 133.4, 133.2, 133.0, 132.3, 128.4, 128.1, 128.0, 127.6, 127.4, 127.3, 126.2, 125.7, 125.5, 124.6, 118.1, 114.1, 83.0, 71.1, 54.2, 37.7, 27.9; HRMS-ESI ( $m/z$ ) calcd for  $[\text{C}_{35}\text{H}_{32}\text{N}_2\text{O}_6+\text{H}]^+$  577.2333; found: 577.2325.

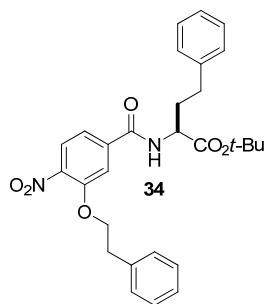

**34.** The product was obtained as a solid (100%) that was homogeneous by TLC analysis.  $R_f = 0.31$  (4:1 hexanes/EtOAc);  $^1\text{H NMR}$  (300 MHz,  $\text{CDCl}_3$ , 25 °C)  $\delta$  7.69 (d,  $J = 8.3$  Hz, 1H), 7.41 (d,  $J = 1.5$  Hz, 1H), 7.21 (m, 12H), 4.74 (m, 1H), 4.25 (m, 2 H), 3.10 (t,  $J = 6.7$  Hz, 2H), 2.72 (t,  $J = 7.0$  Hz, 2H), 2.26 (m, 1 H), 2.11 (m, 1 H), 1.50 (s, 9 H);  $^{13}\text{C NMR}$  (75 MHz,  $\text{CDCl}_3$ , 25 °C)  $\delta$  171.8, 164.6, 151.9, 141.2, 140.6, 138.5, 137.3, 129.1, 128.5, 128.4, 128.2, 126.6, 126.2, 125.2, 117.8, 113.6, 82.8, 70.4, 53.3, 35.4, 33.7, 31.8, 27.9; HRMS-ESI ( $m/z$ ) calcd for  $[\text{C}_{29}\text{H}_{32}\text{N}_2\text{O}_6+\text{H}]^+$  505.2333; found: 505.2330.

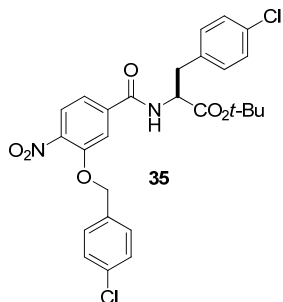

**35.** The product was obtained as a solid (99%) that was homogeneous by TLC analysis.  $R_f = 0.33$  (1:1 hexanes/ $\text{Et}_2\text{O}$ );  $^1\text{H NMR}$  (300 MHz,  $\text{CDCl}_3$ , 25 °C)  $\delta$  7.80 (d,  $J = 8.3$  Hz, 1H), 7.52 (s, 1H), 7.35 (m, 4H), 7.25 (m, 3H), 7.12 (m, 2H), 6.96 (d,  $J = 7.3$  Hz, 1H), 5.17 (s, 2H), 4.90 (q,  $J = 6.0$  Hz, 1H), 3.25

(dd,  $J = 6.2, 14.0$  Hz, 1H), 3.15 (dd,  $J = 5.8, 13.9$  Hz, 1H), 1.48 (s, 9H);  $^{13}\text{C}$  NMR (75 MHz,  $\text{CDCl}_3$ , 25 °C)  $\delta$  170.6, 164.4, 151.5, 141.6, 138.7, 134.4, 134.1, 133.4, 133.0, 130.7, 128.8, 128.5, 128.4, 125.7, 118.2, 114.2, 83.3, 70.4, 54.1, 37.0, 27.9; HRMS-ESI ( $m/z$ ) calcd for  $[\text{C}_{27}\text{H}_{26}\text{Cl}_2\text{N}_2\text{O}_6+\text{H}]^+$  545.1241; found: 545.1246.

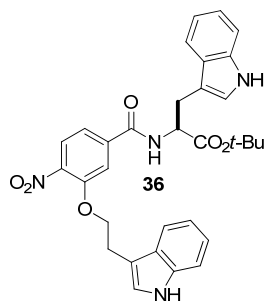

**36.** The product was obtained as a solid (100%) that was homogeneous by TLC analysis.  $R_f = 0.46$  (1:1 hexanes/EtOAc);  $^1\text{H}$  NMR (300 MHz,  $\text{CDCl}_3$ , 25 °C)  $\delta$  8.29 (m, 2H), 7.48 (m, 3H), 7.06 (m, 10H), 6.64 (d,  $J = 7.6$  Hz, 1H), 4.94 (q,  $J = 5.5$  Hz, 1H), 3.95 (m, 2H), 3.39 (dd,  $J = 5.6, 14.9$  Hz, 1H), 3.27 (dd,  $J = 5.6, 14.9$  Hz, 1H), 3.06 (t,  $J = 6.5$  Hz, 2H), 1.42 (s, 9H);  $^{13}\text{C}$  NMR (75 MHz,  $\text{CDCl}_3$ , 25 °C)  $\delta$  170.9, 165.1, 151.9, 140.9, 138.7, 135.9, 127.6, 127.1, 125.2, 122.9, 122.8, 122.1, 121.8, 119.6, 119.2, 118.4, 118.3, 117.9, 113.2, 111.3, 111.2, 111.1, 109.6, 82.7, 69.6, 54.1, 27.9, 27.1, 24.6; HRMS-ESI ( $m/z$ ) calcd for  $[\text{C}_{32}\text{H}_{32}\text{N}_4\text{O}_6+\text{H}]^+$  569.2394; found: 569.2386.

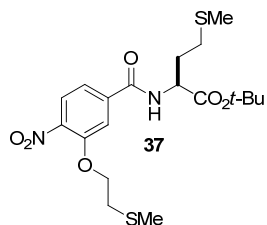

**37.** The product was obtained as a solid (100%) that was homogeneous by TLC analysis.  $R_f = 0.35$  (7:3 hexanes/EtOAc);  $^1\text{H}$  NMR (300 MHz,  $\text{CDCl}_3$ , 25 °C)  $\delta$  7.81 (d,  $J = 8.3$  Hz, 1H), 7.59 (d,  $J = 1.5$  Hz, 1H), 7.38 (dd,  $J = 1.6, 8.3$  Hz, 1H), 7.30 (d,  $J = 7.6$  Hz, 1H), 4.80 (m, 1H), 4.33 (t,  $J = 6.6$  Hz, 2H), 2.93 (t,  $J = 6.7$  Hz, 2H), 2.60 (t,  $J = 7.8$  Hz, 2H), 2.25 (m, 1H), 2.23 (s, 3H), 2.13 (s, 3H), 2.09 (m, 1H), 1.52 (s, 9H);  $^{13}\text{C}$  NMR (75 MHz,  $\text{CDCl}_3$ , 25 °C)  $\delta$  171.1, 164.7, 151.7, 141.5, 138.7, 125.5, 118.2, 114.0, 83.0, 69.7, 52.9, 32.5, 31.4, 30.1, 27.9, 16.3, 15.5; HRMS-ESI ( $m/z$ ) calcd for  $[\text{C}_{19}\text{H}_{28}\text{N}_2\text{O}_6\text{S}_2+\text{H}]^+$  445.1461; found: 445.1465.

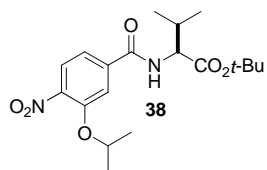

**38.** The product was obtained as a solid (96%) that was homogeneous by TLC analysis.  $R_f = 0.34$  (7:3 hexanes/EtOAc);  $^1\text{H}$  NMR (300 MHz,  $\text{CDCl}_3$ , 25 °C)  $\delta$  7.77 (d,  $J = 8.3$  Hz, 1H), 7.61 (s, 1H), 7.32 (d,  $J = 8.3$  Hz, 1H), 6.89 (d,  $J = 8.3$  Hz, 1H), 4.77 (m, 1H), 4.65 (dd,  $J = 4.6, 8.4$  Hz, 1H), 2.30 (m, 1H), 1.51 (s, 9H), 1.40 (d,  $J = 6.0$  Hz, 6H), 1.02 (d,  $J = 5.7$  Hz, 3H), 1.00 (d,  $J = 6.6$  Hz, 3H);  $^{13}\text{C}$  NMR (75 MHz,



CDCl<sub>3</sub>, 25 °C)  $\delta$  171.1, 165.2, 151.2, 142.5, 138.8, 125.2, 117.3, 115.5, 82.5, 72.8, 58.0, 31.6, 28.0, 21.7, 18.9, 17.8; HRMS-ESI ( $m/z$ ) calcd for [C<sub>19</sub>H<sub>28</sub>N<sub>2</sub>O<sub>6</sub>+H]<sup>+</sup> 381.2020; found: 381.2018.

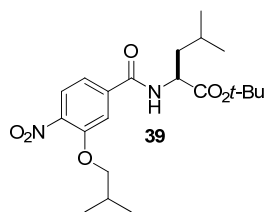

**39.** The product was obtained as a solid (100%) that was homogeneous by TLC analysis.  $R_f$  = 0.32 (4:1 hexanes/EtOAc); <sup>1</sup>H NMR (300 MHz, CDCl<sub>3</sub>, 25 °C)  $\delta$  7.70 (d,  $J$  = 8.3 Hz, 1H), 7.44 (d,  $J$  = 1.5 Hz, 1H), 7.42 (s, 1H), 7.30 (dd,  $J$  = 1.6, 8.4 Hz, 1H), 4.73 (m, 1H), 3.83 (m, 2H), 2.12 (m, 1H), 1.73 (m, 3H), 1.54 (s, 9H), 1.04 (d,  $J$  = 6.7 Hz, 3H), 1.03 (d,  $J$  = 6.7 Hz, 3H), 0.99 (d,  $J$  = 6.2 Hz, 3H), 0.98 (d,  $J$  = 6.2 Hz, 3H); <sup>13</sup>C NMR (75 MHz, CDCl<sub>3</sub>, 25 °C)  $\delta$  173.3, 164.7, 152.2, 141.2, 138.3, 125.1, 117.4, 113.7, 82.6, 75.7, 52.0, 41.2, 28.1, 28.0, 25.0, 22.7, 21.8, 18.9, 18.8; HRMS-ESI ( $m/z$ ) calcd for [C<sub>21</sub>H<sub>32</sub>N<sub>2</sub>O<sub>6</sub>+H]<sup>+</sup> 409.2333; found: 409.2327.

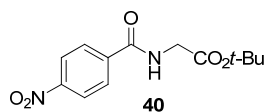

**40.** The product was obtained as a solid (95%) that was homogeneous by TLC analysis.  $R_f$  = 0.40 (1:1 hexanes/EtOAc); <sup>1</sup>H NMR (300 MHz, CDCl<sub>3</sub>, 25 °C)  $\delta$  8.28 (d,  $J$  = 8.8 Hz, 2H), 7.98 (d,  $J$  = 8.8 Hz, 2H), 6.93 (s, 1H), 4.15 (d,  $J$  = 5.0 Hz, 2H), 1.51 (s, 9H); <sup>13</sup>C NMR (75 MHz, CDCl<sub>3</sub>, 25 °C)  $\delta$  168.9, 165.2, 149.6, 139.3, 128.2, 123.8, 83.0, 42.6, 28.0; HRMS-ESI ( $m/z$ ) calcd for [C<sub>13</sub>H<sub>16</sub>N<sub>2</sub>O<sub>5</sub>+Na]<sup>+</sup> 303.0951; found: 303.0953.

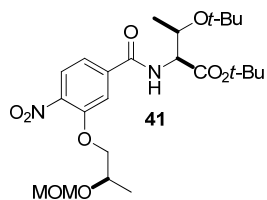

**41.** The product was obtained as a solid (100%) that was homogeneous by TLC analysis.  $R_f$  = 0.38 (7:3 hexanes/EtOAc); <sup>1</sup>H NMR (300 MHz, CDCl<sub>3</sub>, 25 °C)  $\delta$  7.90 (d,  $J$  = 8.3 Hz, 1H), 7.65 (d,  $J$  = 1.5 Hz, 1H), 7.40 (dd,  $J$  = 1.6, 8.3 Hz, 1H), 6.98 (d,  $J$  = 9.0 Hz, 1H), 4.78 (d,  $J$  = 6.9 Hz, 1H), 4.74 (d,  $J$  = 6.9 Hz, 1H), 4.56 (dd,  $J$  = 2.0, 9.0 Hz, 1H), 4.32 (qd,  $J$  = 2.0, 6.2 Hz, 1H), 4.15 (m, 3H), 3.39 (s, 3H), 1.50 (s, 9H), 1.33 (d,  $J$  = 6.0 Hz, 3H), 1.25 (d,  $J$  = 6.3 Hz, 3H), 1.21 (s, 9H); <sup>13</sup>C NMR (75 MHz, CDCl<sub>3</sub>, 25 °C)  $\delta$  169.4, 165.5, 152.1, 141.3, 139.4, 125.6, 118.0, 114.1, 95.5, 82.2, 74.0, 73.3, 70.8, 67.2, 58.9, 55.3, 28.6, 28.0, 21.1, 17.2; HRMS-ESI ( $m/z$ ) calcd for [C<sub>24</sub>H<sub>38</sub>N<sub>2</sub>O<sub>9</sub>+H]<sup>+</sup> 499.2650; found: 499.2646.

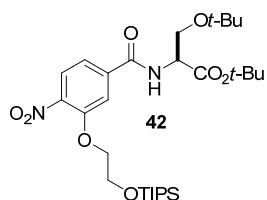

**42.** The product was obtained as a solid (97%) that was homogeneous by TLC analysis.  $R_f = 0.33$  (4:1 hexanes/EtOAc);  $^1\text{H NMR}$  (300 MHz,  $\text{CDCl}_3$ , 25 °C)  $\delta$  7.83 (d,  $J = 8.3$  Hz, 1H), 7.67 (s, 1H), 7.37 (d,  $J = 8.3$  Hz, 1H), 7.02 (d,  $J = 8.0$  Hz, 1H), 4.78 (dt,  $J = 2.6, 8.1$  Hz, 1H), 4.29 (t,  $J = 5.2$  Hz, 2H), 4.10 (t,  $J = 5.1$  Hz, 2H), 3.89 (dd,  $J = 2.6, 8.9$  Hz, 1H), 3.68 (dd,  $J = 2.8, 8.9$  Hz, 1H), 1.51 (s, 9H), 1.17 (s, 9H), 1.08 (m, 21H);  $^{13}\text{C NMR}$  (75 MHz,  $\text{CDCl}_3$ , 25 °C)  $\delta$  169.2, 164.9, 152.3, 141.6, 139.2, 125.4, 118.0, 114.4, 82.3, 73.2, 71.2, 62.0, 61.7, 53.8, 28.0, 27.3, 17.8, 11.8; HRMS-ESI ( $m/z$ ) calcd for  $[\text{C}_{29}\text{H}_{50}\text{N}_2\text{O}_8\text{Si}+\text{H}]^+$  583.3409; found: 583.3401.

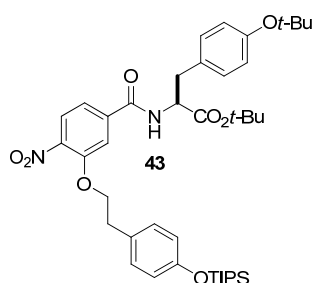

**43.** The product was obtained as a solid (100%) that was homogeneous by TLC analysis.  $R_f = 0.36$  (4:1 hexanes/EtOAc);  $^1\text{H NMR}$  (300 MHz,  $\text{CDCl}_3$ , 25 °C)  $\delta$  7.75 (d,  $J = 8.3$  Hz, 1H), 7.46 (s, 1H), 7.12 (m, 5H), 6.87 (m, 5H), 4.88 (q,  $J = 6.1$  Hz, 1H), 4.24 (t,  $J = 6.9$  Hz, 2H), 3.17 (dd,  $J = 2.6, 6.2$  Hz, 2H), 3.05 (t,  $J = 6.7$  Hz, 2H), 1.44 (s, 9H), 1.31 (s, 9H), 1.24 (m, 3H), 1.09 (d,  $J = 7.0$  Hz, 18H);  $^{13}\text{C NMR}$  (75 MHz,  $\text{CDCl}_3$ , 25 °C)  $\delta$  170.7, 164.5, 154.7, 154.4, 152.1, 141.3, 138.8, 130.6, 130.0, 129.8, 129.5, 125.4, 124.1, 119.8, 117.6, 113.7, 82.8, 78.3, 70.8, 54.2, 37.1, 34.6, 28.7, 27.9, 17.8, 12.5; HRMS-ESI ( $m/z$ ) calcd for  $[\text{C}_{41}\text{H}_{58}\text{N}_2\text{O}_8\text{Si}+\text{H}]^+$  735.4035; found: 735.4024.

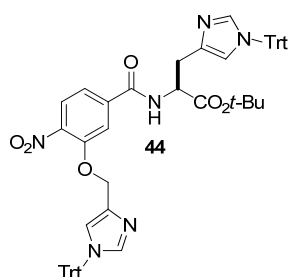

**44.** The product was obtained as a solid (91%) that was homogeneous by TLC analysis.  $R_f = 0.25$  (5:0.1  $\text{CH}_2\text{Cl}_2/\text{MeOH}$ );  $^1\text{H NMR}$  (300 MHz,  $\text{CDCl}_3$ , 25 °C)  $\delta$  7.94 (d,  $J = 1.2$  Hz, 1H), 7.81 (d,  $J = 8.3$  Hz, 1H), 7.51 (dd,  $J = 1.3, 8.4$  Hz, 1H), 7.43 (m, 2H), 7.30 (m, 19H), 7.11 (m, 12H), 7.00 (m, 1H), 6.64 (s, 1H), 5.21 (m, 2H), 4.85 (m, 1H), 3.08 (m, 2H), 1.37 (s, 9H);  $^{13}\text{C NMR}$  (75 MHz,  $\text{CDCl}_3$ , 25 °C)  $\delta$  169.8, 164.6, 151.7, 142.0, 141.4, 139.1, 138.9, 138.6, 136.3, 135.4, 129.5, 127.9, 125.3, 121.2, 119.3, 118.7, 115.2, 81.4, 75.3, 75.1, 66.2, 53.2, 29.2, 27.9; HRMS-ESI ( $m/z$ ) calcd for  $[\text{C}_{59}\text{H}_{52}\text{N}_6\text{O}_6+\text{H}]^+$  941.4021; found: 941.3996.

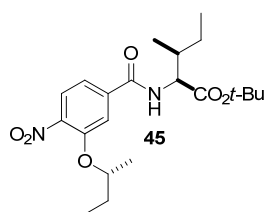

**45.** The product was obtained as a solid (100%) that was homogeneous by TLC analysis.  $R_f = 0.40$  (4:1 hexanes/EtOAc);  $^1\text{H NMR}$  (300 MHz,  $\text{CDCl}_3$ , 25 °C)  $\delta$  7.77 (d,  $J = 8.3$  Hz, 1H), 7.60 (d,  $J = 1.2$  Hz, 1H), 7.29 (dd,  $J = 1.6, 8.3$  Hz, 1H), 6.91 (d,  $J = 8.1$  Hz, 1H), 4.68 (dd,  $J = 4.5, 8.1$  Hz, 1H), 4.56 (m, 1H), 2.02 (m, 1H), 1.75 (m, 2H), 1.56 (m, 1H), 1.51 (s, 9H), 1.35 (d,  $J = 6.1$  Hz, 3H), 1.28 (m, 1H), 0.99 (m, 9H);  $^{13}\text{C NMR}$  (75 MHz,  $\text{CDCl}_3$ , 25 °C)  $\delta$  170.9, 164.9, 151.5, 142.4, 138.9, 125.3, 117.1, 115.2, 82.6, 77.6, 57.2, 38.3, 28.9, 28.0, 25.5, 18.9, 15.3, 11.7, 9.4; HRMS-ESI ( $m/z$ ) calcd for  $[\text{C}_{21}\text{H}_{32}\text{N}_2\text{O}_6+\text{H}]^+$  409.2333; found: 409.2334.

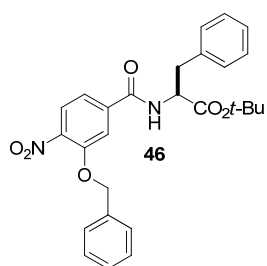

**46.** The product was obtained as a solid (99%) that was homogeneous by TLC analysis.  $R_f = 0.37$  (4:1 hexanes/EtOAc);  $^1\text{H NMR}$  (300 MHz,  $\text{CDCl}_3$ , 25 °C)  $\delta$  7.77 (d,  $J = 8.3$  Hz, 1H), 7.55 (d,  $J = 1.4$  Hz, 1H), 7.30 (m, 11H), 6.91 (d,  $J = 7.5$  Hz, 1H), 5.19 (s, 2H), 4.92 (q,  $J = 6.0$  Hz, 1H), 3.23 (m, 2H), 1.46 (s, 9H);  $^{13}\text{C NMR}$  (75 MHz,  $\text{CDCl}_3$ , 25 °C)  $\delta$  170.7, 164.5, 151.7, 141.6, 138.8, 135.8, 134.9, 129.4, 128.6, 128.4, 128.3, 127.1, 125.5, 118.1, 114.3, 82.9, 71.1, 54.1, 37.7, 27.9; HRMS-ESI ( $m/z$ ) calcd for  $[\text{C}_{27}\text{H}_{28}\text{N}_2\text{O}_6+\text{H}]^+$  477.2020; found: 477.2014.

|       | [PheCl]       | [Ala]         | [Phe]         | [Trp]         | [Asp]         | [Gly]         | [TyrMe]       | [Thr]         | [Val]         | [Ser]         | [Tyr]         | [Met]         | [His]         | [Leu]         | [Ile]         | [Lys]         | [Abu]         | [Asn]         | [Nap]         | [HoPhe]       |
|-------|---------------|---------------|---------------|---------------|---------------|---------------|---------------|---------------|---------------|---------------|---------------|---------------|---------------|---------------|---------------|---------------|---------------|---------------|---------------|---------------|
| PheCl | 162mg<br>99%  | 105mg<br>100% | 154mg<br>100% | 145mg<br>100% | 159mg<br>99%  | 124mg<br>100% | 162mg<br>97%  | 159mg<br>100% | 115mg<br>100% | 130mg<br>96%  | 210mg<br>100% | 120mg<br>100% | 175mg<br>100% | 144mg<br>100% | 122mg<br>100% | 178mg<br>100% | 133mg<br>99%  | 120mg<br>100% | 167mg<br>99%  | 157mg<br>100% |
| Ala   | 125mg<br>96%  | 92mg<br>95%   | 111mg<br>92%  | 137mg<br>100% | 140mg<br>100% | 87mg<br>99%   | 248mg<br>93%  | 113mg<br>91%  | 104mg<br>98%  | 135mg<br>96%  | 153mg<br>94%  | 121mg<br>100% | 177mg<br>93%  | 105mg<br>96%  | 99mg<br>90%   | 145mg<br>100% | 100mg<br>99%  | 102mg<br>93%  | 127mg<br>94%  | 119mg<br>96%  |
| Phe   | 152mg<br>99%  | 114mg<br>95%  | 142mg<br>99%  | 162mg<br>100% | 156mg<br>100% | 114mg<br>100% | 315mg<br>100% | 145mg<br>99%  | 119mg<br>93%  | 168mg<br>100% | 190mg<br>99%  | 137mg<br>99%  | 191mg<br>90%  | 129mg<br>97%  | 120mg<br>90%  | 167mg<br>100% | 120mg<br>97%  | 127mg<br>95%  | 154mg<br>97%  | 145mg<br>99%  |
| Trp   | 172mg<br>100% | 146mg<br>100% | 160mg<br>100% | 176mg<br>100% | 173mg<br>100% | 132mg<br>100% | 339mg<br>100% | 165mg<br>100% | 130mg<br>93%  | 159mg<br>91%  | 172mg<br>87%  | 153mg<br>100% | 240mg<br>100% | 149mg<br>100% | 147mg<br>100% | 191mg<br>100% | 143mg<br>100% | 152mg<br>100% | 178mg<br>100% | 164mg<br>100% |
| Asp   | 163mg<br>100% | 132mg<br>100% | 142mg<br>95%  | 170mg<br>100% | 150mg<br>95%  | 122mg<br>100% | 330mg<br>100% | 160mg<br>100% | 144mg<br>100% | 178mg<br>100% | 168mg<br>87%  | 155mg<br>100% | 196mg<br>89%  | 138mg<br>95%  | 146mg<br>100% | 177mg<br>100% | 128mg<br>97%  | 129mg<br>92%  | 165mg<br>100% | 147mg<br>95%  |
| Gly   | 109mg<br>86%  | 82mg<br>88%   | 103mg<br>89%  | 124mg<br>94%  | 101mg<br>82%  | 80mg<br>95%   | 246mg<br>95%  | 111mg<br>93%  | 88mg<br>87%   | 116mg<br>85%  | 147mg<br>92%  | 100mg<br>90%  | 148mg<br>80%  | 95mg<br>90%   | 100mg<br>95%  | 118mg<br>84%  | 83mg<br>85%   | 86mg<br>81%   | 107mg<br>82%  | 107mg<br>89%  |
| TyrMe | 161mg<br>99%  | 130mg<br>100% | 159mg<br>100% | 173mg<br>100% | 162mg<br>100% | 124mg<br>100% | 163mg<br>99%  | 158mg<br>100% | 133mg<br>97%  | 184mg<br>99%  | 209mg<br>100% | 147mg<br>100% | 217mg<br>98%  | 138mg<br>97%  | 143mg<br>100% | 181mg<br>100% | 134mg<br>100% | 143mg<br>100% | 164mg<br>98%  | 162mg<br>100% |
| Thr   | 158mg<br>100% | 126mg<br>100% | 149mg<br>100% | 166mg<br>100% | 156mg<br>100% | 118mg<br>100% | 160mg<br>100% | 152mg<br>100% | 135mg<br>100% | 180mg<br>100% | 203mg<br>100% | 142mg<br>100% | 194mg<br>90%  | 137mg<br>100% | 139mg<br>100% | 173mg<br>100% | 131mg<br>100% | 137mg<br>100% | 165mg<br>100% | 154mg<br>100% |
| Val   | 136mg<br>98%  | 107mg<br>100% | 125mg<br>97%  | 150mg<br>100% | 138mg<br>100% | 98mg<br>100%  | 286mg<br>100% | 135mg<br>100% | 109mg<br>96%  | 163mg<br>1005 | 188mg<br>100% | 122mg<br>99%  | 176mg<br>89%  | 117mg<br>99%  | 120mg<br>100% | 156mg<br>100% | 108mg<br>98%  | 124mg<br>100% | 146mg<br>100% | 135mg<br>100% |
| Ser   | 150mg<br>99%  | 121mg<br>100% | 140mg<br>99%  | 161mg<br>100% | 148mg<br>99%  | 112mg<br>100% | 157mg<br>100% | 146g<br>100%  | 117mg<br>92%  | 169mg<br>97%  | 203mg<br>100% | 136mg<br>99%  | 195mg<br>92%  | 131mg<br>100% | 129mg<br>98%  | 170mg<br>100% | 117mg<br>95%  | 134mg<br>100% | 156mg<br>100% | 143mg<br>98%  |
| Tyr   | 172mg<br>98%  | 138mg<br>97%  | 158mg<br>96%  | 179mg<br>99%  | 174mg<br>100% | 134mg<br>100% | 179mg<br>100% | 162mg<br>96%  | 148mg<br>99%  | 195mg<br>99%  | 222mg<br>100% | 158mg<br>99%  | 236mg<br>100% | 155mg<br>100% | 152mg<br>98%  | 188mg<br>100% | 147mg<br>100% | 152mg<br>98%  | 173mg<br>96%  | 169mg<br>100% |
| Met   | 147mg<br>99%  | 110mg<br>95%  | 138mg<br>100% | 148mg<br>96%  | 147mg<br>100% | 109mg<br>100% | 153mg<br>100% | 144mg<br>100% | 122mg<br>99%  | 171mg<br>100% | 191mg<br>98%  | 133mg<br>100% | 192mg<br>92%  | 124mg<br>97%  | 122mg<br>100% | 151mg<br>93%  | 118mg<br>99%  | 123g<br>96%   | 156mg<br>100% | 142mg<br>100% |
| His   | 223mg<br>100% | 195mg<br>100% | 214mg<br>100% | 227mg<br>99%  | 221mg<br>100% | 184mg<br>100% | 227mg<br>100% | 218mg<br>100% | 180mg<br>91%  | 242mg<br>98%  | 214mg<br>80%  | 209mg<br>100% | 258mg<br>91%  | 199mg<br>98%  | 205mg<br>100% | 235mg<br>99%  | 196mg<br>100% | 202mg<br>100% | 221mg<br>97%  | 215mg<br>99%  |
| Leu   | 144mg<br>100% | 107mg<br>97%  | 132mg<br>99%  | 147mg<br>99%  | 141mg<br>100% | 103mg<br>100% | 296mg<br>100% | 138mg<br>100% | 117mg<br>99%  | 166mg<br>100% | 191mg<br>100% | 130mg<br>99%  | 204mg<br>100% | 124mg<br>100% | 121mg<br>99%  | 159mg<br>100% | 113mg<br>99%  | 125mg<br>100% | 148mg<br>100% | 135mg<br>99%  |
| Ile   | 137mg<br>96%  | 107mg<br>97%  | 131mg<br>99%  | 150mg<br>100% | 139mg<br>99%  | 105mg<br>100% | 147mg<br>100% | 139mg<br>100% | 119mg<br>100% | 168mg<br>100% | 190mg<br>100% | 133mg<br>100% | 191mg<br>94%  | 121mg<br>99%  | 123mg<br>100% | 161mg<br>100% | 111mg<br>97%  | 127mg<br>100% | 148mg<br>100% | 136mg<br>99%  |
| Lys   | 175mg<br>99%  | 145mg<br>100% | 169mg<br>100% | 185mg<br>100% | 176mg<br>100% | 136mg<br>100% | 185mg<br>100% | 173mg<br>100% | 152mg<br>99%  | 199mg<br>99%  | 223mg<br>100% | 164mg<br>100% | 239mg<br>100% | 158mg<br>100% | 158mg<br>100% | 193mg<br>100% | 150mg<br>100% | 155mg<br>98%  | 184mg<br>100% | 170mg<br>99%  |
| Abu   | 133mg<br>99%  | 98mg<br>97%   | 123mg<br>99%  | 142mg<br>100% | 132mg<br>100% | 95mg<br>100%  | 136mg<br>99%  | 129mg<br>100% | 112mg<br>100% | 158mg<br>100% | 180mg<br>100% | 123mg<br>100% | 183mg<br>94%  | 115mg<br>100% | 116mg<br>100% | 150mg<br>100% | 102mg<br>96%  | 115mg<br>100% | 140mg<br>100% | 129mg<br>100% |
| Asn   | 143mg<br>100% | 102mg<br>93%  | 133mg<br>100% | 150mg<br>100% | 140mg<br>100% | 100mg<br>99%  | 143mg<br>98%  | 138mg<br>100% | 115mg<br>97%  | 167mg<br>100% | 190mg<br>100% | 127mg<br>99%  | 193mg<br>95%  | 124mg<br>100% | 122mg<br>99%  | 158mg<br>100% | 109mg<br>95%  | 158mg<br>77%  | 149mg<br>100% | 135mg<br>98%  |
| Nap   | 169mg<br>100% | 136mg<br>100% | 160mg<br>100% | 174mg<br>100% | 139mg<br>84%  | 130mg<br>100% | 173mg<br>100% | 165mg<br>100% | 145mg<br>100% | 192mg<br>100% | 219mg<br>100% | 157mg<br>100% | 229mg<br>100% | 149mg<br>100% | 150mg<br>100% | 183mg<br>100% | 140mg<br>100% | 149mg<br>100% | 174mg<br>100% | 164mg<br>100% |
| HoPhe | 159mg<br>100% | 125mg<br>100% | 148mg<br>100% | 164mg<br>100% | 155mg<br>100% | 116mg<br>100% | 165mg<br>100% | 152mg<br>100% | 134mg<br>100% | 181mg<br>100% | 204mg<br>100% | 143mg<br>100% | 218mg<br>100% | 137mg<br>99%  | 136mg<br>99%  | 173mg<br>100% | 127mg<br>99%  | 138mg<br>100% | 163mg<br>100% | 152mg<br>100% |
|       | [PheCl]       | [Ala]         | [Phe]         | [Trp]         | [Asp]         | [Gly]         | [TyrMe]       | [Thr]         | [Val]         | [Ser]         | [Tyr]         | [Met]         | [His]         | [Leu]         | [Ile]         | [Lys]         | [Abu]         | [Asn]         | [Nap]         | [HoPhe]       |

Figure S1. Synthesized 400 dimers with coupling yields and product amounts.

## General Procedure for the Reduction of Aryl Nitro Group with Zinc Nanopowder

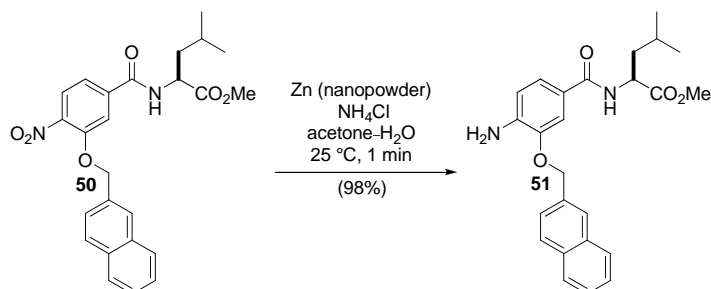

A solution of nitro dimer **50** (45 mg, 0.10 mmol) in acetone/water (5:1, 1.8 mL) in a 1 dram vial was treated with activated zinc nanopowder (65 mg, 0.10 mmol) and ammonium chloride (80 mg, 1.5 mmol). The mixture was vigorously shaken at room temperature for 1 min and filtered. The filtrate was diluted with EtOAc/Et<sub>2</sub>O and extracted saturated aqueous NaHCO<sub>3</sub> (× 1). The organic layer was collected, dried (Na<sub>2</sub>SO<sub>4</sub>), and concentrated to give **51** as a solid (41 mg, 98%) that was homogeneous by TLC analysis. *R<sub>f</sub>* = 0.20 (4:1 hexanes/EtOAc); <sup>1</sup>H NMR (500 MHz, CDCl<sub>3</sub>, 25 °C) δ 7.85 (m, 4H), 7.50 (m, 4H), 7.23 (d, *J* = 8.0 Hz, 1H), 6.68 (d, *J* = 8.0 Hz, 1H), 6.61 (d, *J* = 8.0 Hz, 1H), 5.21 (s, 2H), 4.85 (m, 1H), 4.20 (s, 2H), 3.74 (s, 3H), 1.68 (m, 3H), 0.97 (t, *J* = 6.5 Hz, 6H); HRMS-ESI (*m/z*) calcd for [C<sub>25</sub>H<sub>28</sub>N<sub>2</sub>O<sub>4</sub>+H]<sup>+</sup> 421.2122; found: 421.2126.

## General Procedure for the Preparation of the Library Trimers as 20 Compound Mixtures

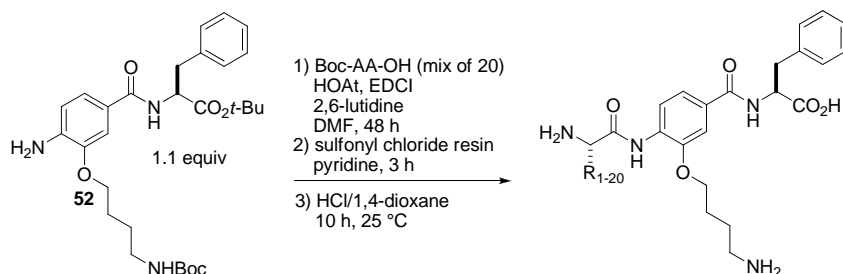

Aniline dimer **52** (41 mg, 0.0771 mmol, 1.1 equiv) was placed in a 0.5 dram vial and treated with the prepared 0.10 M stock solution of a mixture of 20 Boc-AA-OH in DMF (0.70 mL, 0.070 mmol). HOAt (20 mg, 0.147 mmol), EDCI (16.1 mg, 0.084 mmol), and 2,6-lutidine (50 mL, 0.43 mmol) were added. The mixture was agitated on a titer plate shaker for 48 h, diluted with EtOAc/Et<sub>2</sub>O, extracted with aqueous HCl (0.1 M, × 2) and saturated aqueous NaHCO<sub>3</sub> (× 2). The organic layer was collected, dried (Na<sub>2</sub>SO<sub>4</sub>), and concentrated. The product mixture was then transferred into a 1 dram vial, treated with sulfonyl chloride polystyrene resin (100 mg, loading level 2.4 mmol/g), pyridine (2.0 mL), and agitated on a titer plate shaker for 5 h. The resin was drained and washed with Et<sub>2</sub>O, EtOAc, and CH<sub>2</sub>Cl<sub>2</sub>. All the washes were combined with the original filtrate, diluted with EtOAc/Et<sub>2</sub>O, extracted with aqueous HCl (0.2 M, × 3). The organic layer was collected, dried (Na<sub>2</sub>SO<sub>4</sub>), and concentrated. The product mixture was again transferred into a 1 dram vial, treated with 4.0 M solution of HCl in 1,4-dioxane (2.0 mL), and agitated on a titer plate shaker for 10 h. The solvent was evaporated with a stream of nitrogen. The product mixture was dried under vacuum and dissolved in DMSO (1.40 mL) to prepare a 50 mM stock solution for screening dispensing.

## Preparation of a Stock Solution of a Mixture of 20 Boc-Protected Amino Acids

Twenty Boc-AA-OH (Figure S2) were combined to generate 0.10 M stock solution in DMF (0.50 mmol of each amino acid in 100.0 mL of DMF).

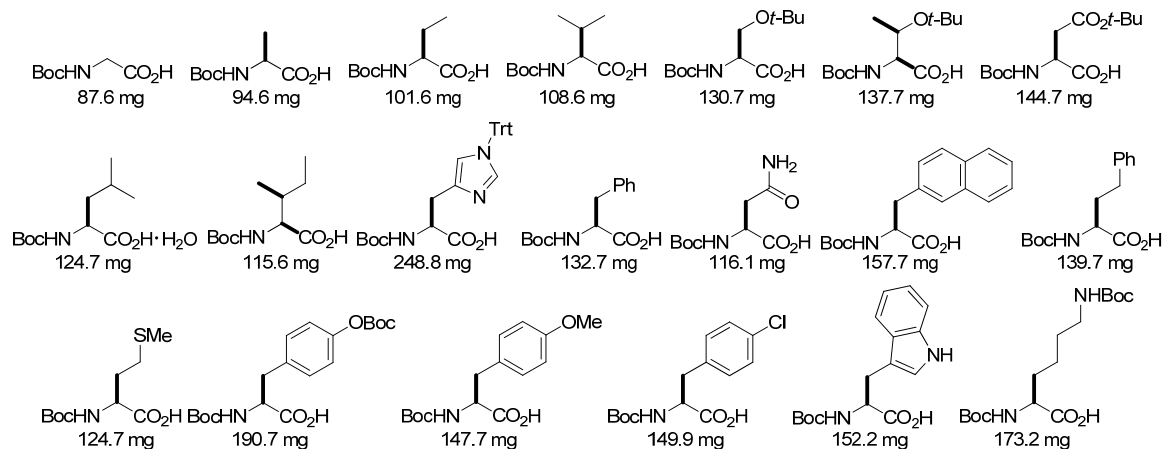

**Figure S2.** Boc-protected amino acids used to generate a stock solution

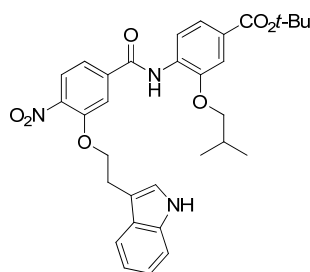

$\text{O}_2\text{N}$ -[Trp]-[Leu]-OtBu.  $^1\text{H}$  NMR (500 MHz,  $\text{CDCl}_3$ , 25 °C)  $\delta$  8.73 (s, 1H), 8.54 (d,  $J$  = 8.5 Hz, 1H), 8.12 (s, 1H), 7.91 (d,  $J$  = 8.0 Hz, 1H), 7.66 (m, 3H), 7.55 (s, 1H), 7.39 (d,  $J$  = 8.0 Hz, 2H), 7.21 (m, 2H), 7.14 (t,  $J$  = 7.0 Hz, 1H), 4.44 (t,  $J$  = 7.0 Hz, 2H), 3.90 (d,  $J$  = 6.5 Hz, 2H), 3.35 (t,  $J$  = 7.0 Hz, 2H), 2.14 (m, 1H), 1.62 (s, 9H), 1.03 (d,  $J$  = 7.0 Hz, 6H); HRMS-MALDI ( $m/z$ ) calcd for  $[\text{C}_{32}\text{H}_{35}\text{N}_3\text{O}_7+\text{H}]^+$  574.2548; found: 574.2532.

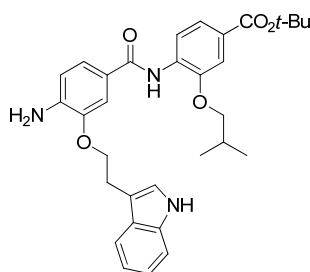

$\text{H}_2\text{N}$ -[Trp]-[Leu]-OtBu.  $^1\text{H}$  NMR (500 MHz,  $\text{DMSO}-d_6$ , 25 °C)  $\delta$  10.90 (s, 1H), 8.98 (s, 1H), 8.19 (d,  $J$  = 8.5 Hz, 1H), 7.60 (d,  $J$  = 8.0 Hz, 1H), 7.52 (d,  $J$  = 8.5 Hz, 1H), 7.45 (s, 1H), 7.34 (m, 4H), 7.08 (t,  $J$  = 7.0 Hz, 1H), 6.99 (t,  $J$  = 7.0 Hz, 1H), 6.69 (d,  $J$  = 8.0 Hz, 1H), 5.47 (s, 2H), 4.23 (t,  $J$  = 7.0 Hz, 2H), 3.85 (d,  $J$  = 6.5 Hz, 2H), 3.23 (t,  $J$  = 7.0 Hz, 2H), 2.01 (m, 1H), 1.54 (s, 9H), 0.91 (d,  $J$  = 7.0 Hz, 6H); HRMS-MALDI ( $m/z$ ) calcd for  $[\text{C}_{32}\text{H}_{37}\text{N}_3\text{O}_5+\text{H}]^+$  544.2806; found: 544.2792.

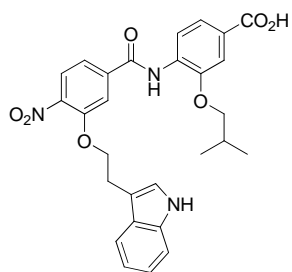

O<sub>2</sub>N-[Trp]-[Leu]-OH. <sup>1</sup>H NMR (500 MHz, acetone-*d*<sub>6</sub>, 25 °C) δ 11.20 (s, 1H), 10.13 (s, 1H), 9.15 (s, 1H), 8.48 (d, *J* = 8.5 Hz, 1H), 7.99 (d, *J* = 8.5 Hz, 1H), 7.85 (s, 1H), 7.72 (d, *J* = 8.5 Hz, 1H), 7.66 (d, *J* = 6.5 Hz, 2H), 7.62 (s, 1H), 7.40 (d, *J* = 8.0 Hz, 1H), 7.33 (s, 1H), 7.10 (t, *J* = 8.0 Hz, 1H), 7.03 (t, *J* = 8.0 Hz, 1H), 4.57 (t, *J* = 7.0 Hz, 2H), 3.94 (d, *J* = 6.5 Hz, 2H), 3.34 (t, *J* = 7.0 Hz, 2H), 2.12 (m, 1H), 0.99 (d, *J* = 7.0 Hz, 6H); HRMS-MALDI (*m/z*) calcd for [C<sub>28</sub>H<sub>27</sub>N<sub>3</sub>O<sub>7</sub>+H]<sup>+</sup> 518.1922; found: 518.1918.

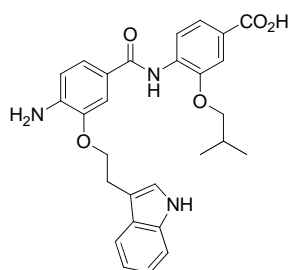

H<sub>2</sub>N-[Trp]-[Leu]-OH. <sup>1</sup>H NMR (500 MHz, DMSO-*d*<sub>6</sub>, 25 °C) δ 12.83 (s, 1H), 10.90 (s, 1H), 8.99 (s, 1H), 8.20 (d, *J* = 8.5 Hz, 1H), 7.60 (d, *J* = 8.0 Hz, 1H), 7.57 (d, *J* = 8.5 Hz, 1H), 7.50 (s, 1H), 7.34 (m, 4H), 7.08 (t, *J* = 7.0 Hz, 1H), 6.99 (t, *J* = 7.0 Hz, 1H), 6.70 (d, *J* = 8.0 Hz, 1H), 5.52 (s, 2H), 4.24 (t, *J* = 7.0 Hz, 2H), 3.85 (d, *J* = 6.0 Hz, 2H), 3.23 (t, *J* = 7.0 Hz, 2H), 2.01 (m, 1H), 0.91 (d, *J* = 6.5 Hz, 6H); HRMS-MALDI (*m/z*) calcd for [C<sub>28</sub>H<sub>29</sub>N<sub>3</sub>O<sub>5</sub>+H]<sup>+</sup> 488.2180; found: 488.2173.

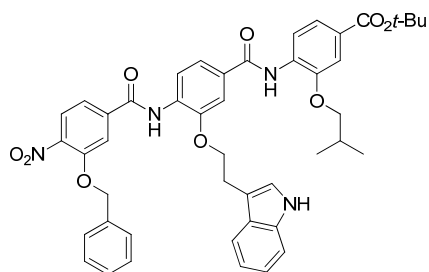

O<sub>2</sub>N-[Phe]-[Trp]-[Leu]-OtBu. <sup>1</sup>H NMR (600 MHz, DMSO-*d*<sub>6</sub>, 25 °C) δ 10.90 (s, 1H), 9.75 (s, 1H), 9.49 (s, 1H), 8.05 (m, 3H), 7.95 (s, 1H), 7.69 (s, 1H), 7.59 (m, 4H), 7.45 (m, 5H), 7.34 (m, 2H), 7.25 (s, 1H), 7.03 (t, *J* = 7.2 Hz, 1H), 6.86 (t, *J* = 7.2 Hz, 1H), 5.40 (s, 2H), 4.41 (t, *J* = 6.6 Hz, 2H), 3.86 (d, *J* = 6.0 Hz, 2H), 3.26 (t, *J* = 6.6 Hz, 2H), 2.02 (m, 1H), 1.55 (s, 9H), 0.92 (d, *J* = 6.6 Hz, 6H); HRMS-MALDI (*m/z*) calcd for [C<sub>46</sub>H<sub>46</sub>N<sub>4</sub>O<sub>9</sub>+H]<sup>+</sup> 799.3337; found: 799.3319.

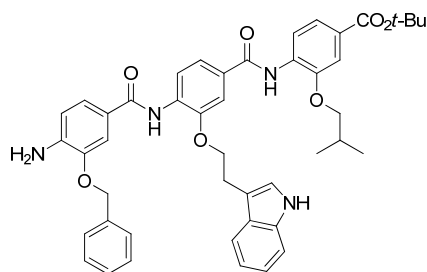

H<sub>2</sub>N-[Phe]-[Trp]-[Leu]-OtBu. <sup>1</sup>H NMR (500 MHz, CDCl<sub>3</sub>, 25 °C) δ 8.85 (s, 1H), 8.64 (m, 3H), 7.98 (s, 1H), 7.66 (m, 3H), 7.55 (s, 1H), 7.51 (s, 1H), 7.40 (m, 7H), 7.22 (t, *J* = 7.0 Hz, 1H), 7.12 (t, *J* = 7.0 Hz, 1H), 7.07 (s, 1H), 6.97 (d, *J* = 8.0 Hz, 1H), 6.54 (d, *J* = 8.5 Hz, 1H), 5.10 (s, 2H), 4.56 (t, *J* = 6.5 Hz, 2H), 4.24 (s, 2H), 3.93 (d, *J* = 6.0 Hz, 2H), 3.37 (t, *J* = 6.5 Hz, 2H), 2.19 (m, 1H), 1.62 (s, 9H), 1.09 (d, *J* = 6.5 Hz, 6H); HRMS-MALDI (*m/z*) calcd for [C<sub>46</sub>H<sub>48</sub>N<sub>4</sub>O<sub>7</sub>+H]<sup>+</sup> 769.3596; found: 769.3572.

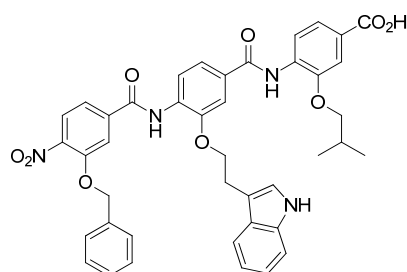

O<sub>2</sub>N-[Phe]-[Trp]-[Leu]-OH. <sup>1</sup>H NMR (600 MHz, DMSO-*d*<sub>6</sub>, 25 °C) δ 12.92 (s, 1H), 10.89 (s, 1H), 9.75 (s, 1H), 9.47 (s, 1H), 8.05 (m, 3H), 7.95 (s, 1H), 7.69 (s, 1H), 7.58 (m, 5H), 7.47 (d, *J* = 7.2 Hz, 2H), 7.42 (t, *J* = 7.2 Hz, 2H), 7.35 (t, *J* = 7.2 Hz, 1H), 7.32 (d, *J* = 7.8 Hz, 1H), 7.25 (s, 1H), 7.03 (t, *J* = 7.2 Hz, 1H), 6.86 (t, *J* = 7.2 Hz, 1H), 5.40 (s, 2H), 4.41 (t, *J* = 6.6 Hz, 2H), 3.86 (d, *J* = 6.0 Hz, 2H), 3.26 (t, *J* = 6.6 Hz, 2H), 2.03 (m, 1H), 0.92 (d, *J* = 6.6 Hz, 6H); HRMS-MALDI (*m/z*) calcd for [C<sub>42</sub>H<sub>38</sub>N<sub>4</sub>O<sub>9</sub>+H]<sup>+</sup> 743.2711; found: 743.2711.

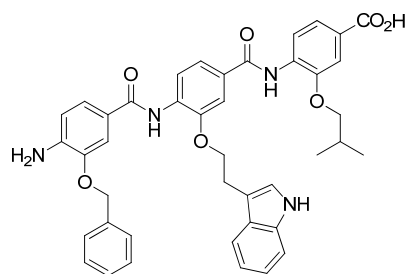

H<sub>2</sub>N-[Phe]-[Trp]-[Leu]-OH. <sup>1</sup>H NMR (600 MHz, DMSO-*d*<sub>6</sub>, 25 °C) δ 12.90 (s, 1H), 10.91 (s, 1H), 9.39 (s, 1H), 8.99 (s, 1H), 8.26 (d, *J* = 8.4 Hz, 1H), 8.08 (d, *J* = 8.4 Hz, 1H), 7.64 (s, 1H), 7.59 (m, 3H), 7.51 (m, 4H), 7.38 (t, *J* = 7.2 Hz, 2H), 7.33 (t, *J* = 8.4 Hz, 2H), 7.27 (m, 2H), 7.05 (t, *J* = 7.2 Hz, 1H), 6.90 (t, *J* = 7.2 Hz, 1H), 6.72 (d, *J* = 8.4 Hz, 1H), 5.57 (s, 2H), 5.18 (s, 2H), 4.42 (t, *J* = 6.6 Hz, 2H), 3.86 (d, *J* = 6.0 Hz, 2H), 2.03 (m, 1H), 0.92 (d, *J* = 6.6 Hz, 6H); HRMS-MALDI (*m/z*) calcd for [C<sub>42</sub>H<sub>40</sub>N<sub>4</sub>O<sub>7</sub>+H]<sup>+</sup> 713.2970; found: 713.2963.



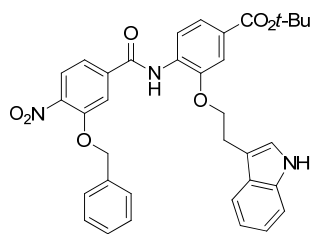

O<sub>2</sub>N-[Phe]-[Trp]-OtBu. <sup>1</sup>H NMR (500 MHz, CDCl<sub>3</sub>, 25 °C) δ 8.53 (s, 1H), 8.50 (d, *J* = 8.5 Hz, 1H), 8.24 (s, 1H), 7.70 (d, *J* = 8.5 Hz, 1H), 7.65 (s, 1H), 7.61 (s, 1H), 7.59 (d, *J* = 8.0 Hz, 1H), 7.52 (d, *J* = 8.5 Hz, 1H), 7.39 (m, 4H), 7.33 (d, *J* = 7.0 Hz, 1H), 7.30 (d, *J* = 8.0 Hz, 1H), 7.17 (t, *J* = 7.5 Hz, 1H), 7.07 (t, *J* = 8.0 Hz, 1H), 6.98 (s, 1H), 6.70 (d, *J* = 8.5 Hz, 1H), 5.15 (s, 2H), 4.53 (t, *J* = 6.5 Hz, 2H), 3.29 (t, *J* = 6.5 Hz, 2H), 1.63 (s, 9H); HRMS-ESI (*m/z*) calcd for [C<sub>35</sub>H<sub>33</sub>N<sub>3</sub>O<sub>7</sub>+H]<sup>+</sup> 608.2391; found: 608.2392.

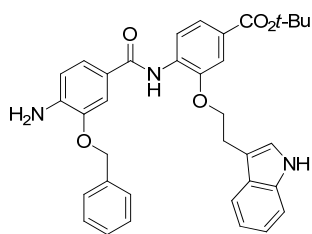

H<sub>2</sub>N-[Phe]-[Trp]-OtBu. <sup>1</sup>H NMR (500 MHz, CDCl<sub>3</sub>, 25 °C) δ 8.61 (s, 1H), 8.57 (d, *J* = 8.5 Hz, 1H), 8.02 (s, 1H), 7.67 (d, *J* = 8.5 Hz, 1H), 7.63 (d, *J* = 8.0 Hz, 1H), 7.60 (s, 1H), 7.49 (s, 1H), 7.37 (m, 6H), 7.20 (t, *J* = 7.5 Hz, 1H), 7.11 (t, *J* = 7.5 Hz, 1H), 7.03 (s, 1H), 6.93 (d, *J* = 8.5 Hz, 1H), 6.50 (d, *J* = 8.0 Hz, 1H), 5.06 (s, 2H), 4.50 (t, *J* = 6.5 Hz, 2H), 4.21 (s, 2H), 3.33 (t, *J* = 6.5 Hz, 2H), 1.60 (s, 9H); HRMS-ESI (*m/z*) calcd for [C<sub>35</sub>H<sub>35</sub>N<sub>3</sub>O<sub>5</sub>+H]<sup>+</sup> 578.2649; found: 578.2650.

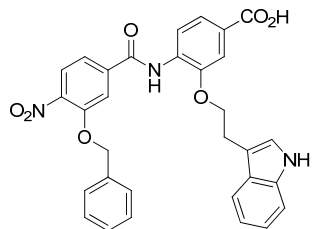

O<sub>2</sub>N-[Phe]-[Trp]-OH. <sup>1</sup>H NMR (400 MHz, DMSO-*d*<sub>6</sub>, 25 °C) δ 12.99 (s, 1H), 10.88 (s, 1H), 9.66 (s, 1H), 8.03 (m, 2H), 7.92 (s, 1H), 7.63 (m, 2H), 7.55 (d, *J* = 8.0 Hz, 1H), 7.50 (d, *J* = 8.4 Hz, 1H), 7.43 (m, 4H), 7.36 (d, *J* = 7.2 Hz, 1H), 7.30 (d, *J* = 8.0 Hz, 1H), 7.25 (s, 1H), 7.01 (t, *J* = 7.2 Hz, 1H), 6.84 (t, *J* = 7.2 Hz, 1H), 5.38 (s, 2H), 4.40 (t, *J* = 6.8 Hz, 2H), 3.23 (t, *J* = 6.8 Hz, 2H); HRMS-ESI (*m/z*) calcd for [C<sub>31</sub>H<sub>25</sub>N<sub>3</sub>O<sub>7</sub>+H]<sup>+</sup> 552.1765; found: 552.1769.

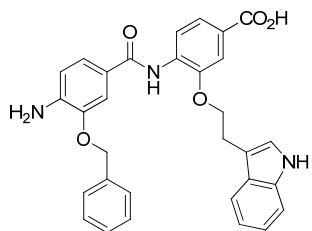

H<sub>2</sub>N-[Phe]-[Trp]-OH. <sup>1</sup>H NMR (600 MHz, DMSO-*d*<sub>6</sub>, 25 °C) δ 12.81 (s, 1H), 10.90 (s, 1H), 8.94 (s, 1H), 8.24 (d, *J* = 8.4 Hz, 1H), 7.59 (m, 3H), 7.47 (m, 4H), 7.32 (m, 6H), 7.20 (d, *J* = 8.4 Hz, 1H), 7.05 (t, *J* = 7.2 Hz, 1H), 6.89 (t, *J* = 7.2 Hz, 1H), 6.70 (d, *J* = 8.4 Hz, 1H), 5.16 (s, 2H), 4.42 (t, *J* = 6.6 Hz, 2H), 3.28 (t, *J* = 6.6 Hz, 2H); HRMS-ESI (*m/z*) calcd for [C<sub>31</sub>H<sub>28</sub>N<sub>3</sub>O<sub>5</sub>+H]<sup>+</sup> 522.2029; found: 522.2012.

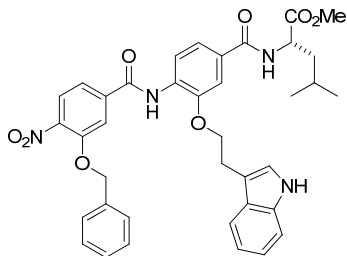

O<sub>2</sub>N-[Phe]-[Trp]-Leu-OMe. <sup>1</sup>H NMR (600 MHz, CDCl<sub>3</sub>, 25 °C) δ 8.48 (s, 1H), 8.44 (d, *J* = 8.4 Hz, 1H), 8.30 (s, 1H), 7.60 (s, 1H), 7.53 (m, 3H), 7.45 (m, 7H), 7.15 (t, *J* = 7.2 Hz, 1H), 7.04 (t, *J* = 7.2 Hz, 1H), 6.94 (s, 1H), 6.75 (d, *J* = 7.8 Hz, 1H), 6.69 (d, *J* = 8.4 Hz, 1H), 5.15 (s, 2H), 4.86 (m, 1H), 4.45 (m, 2H), 3.77 (s, 3H), 3.23 (t, *J* = 6.0 Hz, 2H), 1.75 (m, 3H), 1.00 (t, *J* = 6.6 Hz, 6H); HRMS-ESI (*m/z*) calcd for [C<sub>38</sub>H<sub>38</sub>N<sub>4</sub>O<sub>8</sub>+H]<sup>+</sup> 679.2762; found: 679.2754.

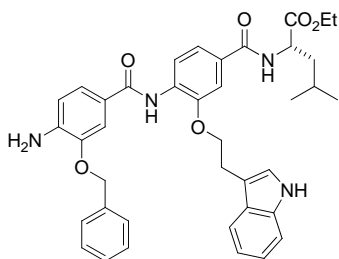

H<sub>2</sub>N-[Phe]-[Trp]-Leu-OEt. <sup>1</sup>H NMR (600 MHz, CDCl<sub>3</sub>, 25 °C) δ 8.58 (m, 2H), 8.05 (s, 1H), 7.62 (d, *J* = 7.8 Hz, 1H), 7.55 (s, 1H), 7.49 (s, 1H), 7.37 (m, 7H), 7.20 (t, *J* = 7.2 Hz, 1H), 7.11 (t, *J* = 7.2 Hz, 1H), 7.03 (s, 1H), 6.92 (d, *J* = 8.4 Hz, 1H), 6.55 (d, *J* = 8.4 Hz, 1H), 6.51 (d, *J* = 8.4 Hz, 1H), 5.07 (s, 2H), 4.84 (m, 1H), 4.50 (t, *J* = 6.0 Hz, 2H), 4.24 (m, 4H), 3.32 (t, *J* = 6.0 Hz, 2H), 1.73 (m, 3H), 1.31 (t, *J* = 6.6 Hz, 3H), 1.01 (d, *J* = 5.4 Hz, 3H), 0.99 (d, *J* = 5.4 Hz, 3H); HRMS-ESI (*m/z*) calcd for [C<sub>39</sub>H<sub>42</sub>N<sub>4</sub>O<sub>6</sub>+H]<sup>+</sup> 663.3177; found: 663.3181.

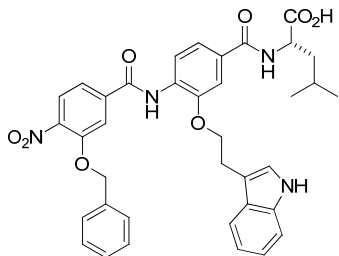

O<sub>2</sub>N-[Phe]-[Trp]-Leu-OH. <sup>1</sup>H NMR (600 MHz, CDCl<sub>3</sub>, 25 °C) δ 8.43 (s, 1H), 8.38 (d, *J* = 7.2 Hz, 1H), 8.17 (s, 1H), 7.39 (m, 11H), 7.13 (t, *J* = 7.2 Hz, 1H), 7.01 (t, *J* = 7.2 Hz, 1H), 6.95 (s, 1H), 6.85 (s, 1H), 6.64 (s, 1H), 5.10 (s, 2H), 4.80 (s, 1H), 4.37 (s, 2H), 3.16 (s, 2H), 1.79 (m, 3H), 0.99 (d, *J* = 4.2 Hz, 6H); HRMS-ESI (*m/z*) calcd for [C<sub>37</sub>H<sub>36</sub>N<sub>4</sub>O<sub>8</sub>+H]<sup>+</sup> 665.2606; found: 665.2596.

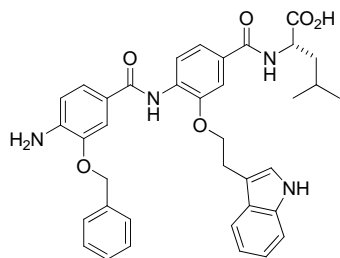

H<sub>2</sub>N-[Phe]-[Trp]-Leu-OH. <sup>1</sup>H NMR (500 MHz, CD<sub>2</sub>Cl<sub>2</sub>-CD<sub>3</sub>OD (1:1), 25 °C) δ 8.43 (s, 1H), 7.85 (m, 2H), 7.67 (m, 9H), 7.37 (m, 2H), 7.25 (m, 2H), 5.34 (s, 2H), 4.95 (m, 1H), 4.81 (t, *J* = 6.0 Hz, 2H), 3.60 (t, *J* = 6.0 Hz, 2H), 2.02 (m, 3H), 1.23 (t, *J* = 6.0 Hz, 6H); HRMS-ESI (*m/z*) calcd for [C<sub>37</sub>H<sub>38</sub>N<sub>4</sub>O<sub>6</sub>+H]<sup>+</sup> 635.2864; found: 635.2871.

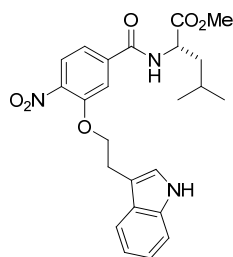

O<sub>2</sub>N-[Trp]-Leu-OMe. <sup>1</sup>H NMR (600 MHz, CDCl<sub>3</sub>, 25 °C) δ 8.20 (s, 1H), 7.77 (d, *J* = 8.4 Hz, 1H), 7.62 (d, *J* = 7.8 Hz, 1H), 7.49 (s, 1H), 7.36 (d, *J* = 8.4 Hz, 1H), 7.28 (d, *J* = 7.2 Hz, 1H), 7.16 (m, 3H), 6.76 (s, 1H), 4.83 (m, 1H), 4.34 (t, *J* = 6.6 Hz, 2H), 3.75 (s, 3H), 3.29 (t, *J* = 6.6 Hz, 2H), 1.71 (m, 3H), 0.99 (d, *J* = 6.6 Hz, 3H), 0.97 (d, *J* = 6.6 Hz, 3H); HRMS-ESI (*m/z*) calcd for [C<sub>24</sub>H<sub>27</sub>N<sub>3</sub>O<sub>6</sub>+H]<sup>+</sup> 454.1973; found: 454.1962.

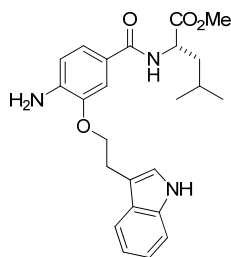

H<sub>2</sub>N-[Trp]-Leu-OMe. <sup>1</sup>H NMR (500 MHz, CDCl<sub>3</sub>, 25 °C) δ 8.30 (s, 1H), 7.65 (d, *J* = 7.5 Hz, 1H), 7.36 (m, 2H), 7.20 (m, 2H), 7.14 (t, *J* = 7.5 Hz, 1H), 7.04 (s, 1H), 6.61 (d, *J* = 8.0 Hz, 1H), 6.44 (s, 1H), 4.85 (m, 1H), 4.28 (t, *J* = 6.5 Hz, 2H), 4.08 (s, 2H), 3.74 (s, 3H), 3.25 (t, *J* = 6.5 Hz, 2H), 1.70 (m, 3H), 0.98 (d, *J* = 6.0 Hz, 3H), 0.96 (d, *J* = 6.0 Hz, 3H); HRMS-ESI (*m/z*) calcd for [C<sub>24</sub>H<sub>29</sub>N<sub>3</sub>O<sub>4</sub>+H]<sup>+</sup> 424.2231; found: 424.2220.

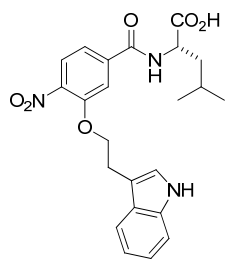

O<sub>2</sub>N-[Trp]-Leu-OH. <sup>1</sup>H NMR (400 MHz, CDCl<sub>3</sub>, 25 °C) δ 8.17 (s, 1H), 7.68 (d, *J* = 8.0 Hz, 1H), 7.57 (d, *J* = 8.0 Hz, 1H), 7.41 (s, 1H), 7.31 (d, *J* = 8.0 Hz, 1H), 7.13 (m, 4H), 6.72 (d, *J* = 8.0 Hz, 1H), 4.77 (m, 1H), 4.25 (t, *J* = 6.8 Hz, 2H), 3.21 (t, *J* = 6.4 Hz, 2H), 1.74 (m, 3H), 0.97 (d, *J* = 5.2 Hz, 6H); HRMS-ESI (*m/z*) calcd for [C<sub>23</sub>H<sub>25</sub>N<sub>3</sub>O<sub>6</sub>+H]<sup>+</sup> 440.1816; found: 440.1820.

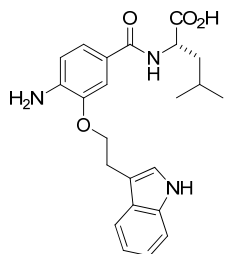

H<sub>2</sub>N-[Trp]-Leu-OH. <sup>1</sup>H NMR (500 MHz, acetone-*d*<sub>6</sub>, 25 °C) δ 10.07 (s, 1H), 7.66 (d, *J* = 8.0 Hz, 1H), 7.51 (d, *J* = 8.0 Hz, 1H), 7.47 (s, 1H), 7.40 (d, *J* = 8.0 Hz, 2H), 7.30 (s, 1H), 7.10 (t, *J* = 7.0 Hz, 1H), 7.03 (t, *J* = 7.0 Hz, 1H), 6.69 (d, *J* = 8.0 Hz, 1H), 4.68 (m, 1H), 4.27 (t, *J* = 7.0 Hz, 2H), 3.27 (t, *J* = 7.0 Hz, 2H), 1.75 (m, 3H), 0.93 (d, *J* = 6.5 Hz, 6H); HRMS-ESI (*m/z*) calcd for [C<sub>23</sub>H<sub>27</sub>N<sub>3</sub>O<sub>4</sub>+H]<sup>+</sup> 410.2074; found: 410.2074.

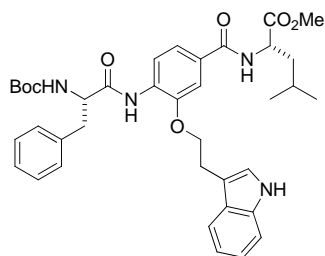

Boc-Phe-[Trp]-Leu-OMe. <sup>1</sup>H NMR (500 MHz, CDCl<sub>3</sub>, 25 °C) δ 8.67 (s, 1H), 8.33 (s, 1H), 8.18 (s, 1H), 7.58 (d, *J* = 7.5 Hz, 1H), 7.40 (s, 1H), 7.36 (d, *J* = 8.0 Hz, 1H), 7.30 (d, *J* = 8.5 Hz, 1H), 7.24 (m, 3H), 7.19 (d, *J* = 7.5 Hz, 1H), 7.13 (m, 3H), 7.00 (s, 1H), 6.94 (s, 1H), 5.19 (s, 1H), 4.87 (m, 1H), 4.48 (s, 1H), 4.17 (m, 2H), 3.74 (s, 3H), 3.14 (t, *J* = 6.5 Hz, 2H), 3.09 (s, 1H), 2.97 (s, 1H), 1.74 (m, 3H), 1.44 (s, 9H), 0.98 (t, *J* = 6.0 Hz, 6H); HRMS-ESI (*m/z*) calcd for [C<sub>38</sub>H<sub>46</sub>N<sub>4</sub>O<sub>7</sub>+H]<sup>+</sup> 671.3439; found: 671.3443.

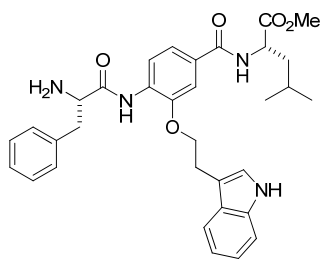

H<sub>2</sub>N-Phe-[Trp]-Leu-OMe. <sup>1</sup>H NMR (500 MHz, DMSO-*d*<sub>6</sub>, 25 °C) δ 10.95 (s, 1H), 9.68 (s, 1H), 8.68 (d, *J* = 8.0 Hz, 1H), 8.37 (s, 3H), 7.99 (d, *J* = 8.5 Hz, 1H), 7.56 (m, 3H), 7.30 (m, 7H), 7.08 (t, *J* = 7.5 Hz, 1H), 7.00 (t, *J* = 7.5 Hz, 1H), 4.50 (m, 2H), 4.32 (m, 2H), 3.63 (s, 3H), 3.16 (m, 4H), 1.67 (m, 3H), 0.91 (d, *J* = 6.5 Hz, 3H), 0.86 (d, *J* = 6.5 Hz, 3H); HRMS-ESI (*m/z*) calcd for [C<sub>33</sub>H<sub>38</sub>N<sub>4</sub>O<sub>5</sub>+H]<sup>+</sup> 571.2915; found: 571.2916.

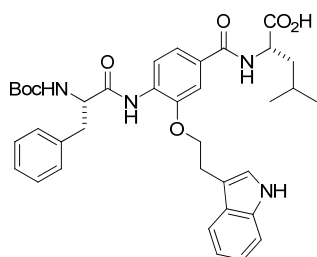

Boc-Phe-[Trp]-Leu-OH. <sup>1</sup>H NMR (500 MHz, acetone-*d*<sub>6</sub>, 25 °C) δ 10.09 (s, 1H), 9.09 (s, 1H), 8.44 (d, *J* = 8.0 Hz, 1H), 7.83 (d, *J* = 8.0 Hz, 1H), 7.66 (d, *J* = 7.5 Hz, 1H), 7.61 (s, 1H), 7.58 (d, *J* = 8.5 Hz, 1H), 7.41 (d, *J* = 8.5 Hz, 1H), 7.36 (s, 1H), 7.30 (m, 4H), 7.21 (m, 1H), 7.11 (t, *J* = 7.5 Hz, 1H), 7.04 (t, *J* = 7.5 Hz, 1H), 6.51 (d, *J* = 7.5 Hz, 1H), 4.73 (m, 1H), 4.57 (s, 1H), 4.34 (t, *J* = 7.5 Hz, 2H), 3.33 (m, 3H), 2.99 (m, 1H), 1.74 (m, 3H), 1.37 (s, 9H), 0.94 (d, *J* = 6.0 Hz, 6H); HRMS-ESI (*m/z*) calcd for [C<sub>37</sub>H<sub>44</sub>N<sub>4</sub>O<sub>7</sub>+H]<sup>+</sup> 657.3283; found: 657.3282.

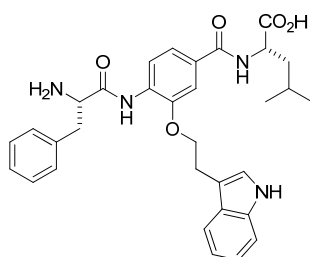

H<sub>2</sub>N-Phe-[Trp]-Leu-OH. <sup>1</sup>H NMR (500 MHz, DMSO-*d*<sub>6</sub>, 25 °C) δ 12.57 (s, 1H), 10.94 (s, 1H), 9.67 (s, 1H), 8.55 (d, *J* = 8.0 Hz, 1H), 8.33 (s, 3H), 7.99 (d, *J* = 8.5 Hz, 1H), 7.57 (m, 3H), 7.30 (m, 7H), 7.08 (t, *J* = 8.0 Hz, 1H), 7.00 (t, *J* = 8.0 Hz, 1H), 4.47 (m, 2H), 4.32 (m, 2H), 3.21 (t, *J* = 7.5 Hz, 2H), 3.14 (m, 2H), 1.66 (m, 3H), 0.91 (d, *J* = 6.0 Hz, 3H), 0.86 (d, *J* = 6.0 Hz, 3H); HRMS-ESI (*m/z*) calcd for [C<sub>32</sub>H<sub>36</sub>N<sub>4</sub>O<sub>5</sub>+H]<sup>+</sup> 557.2758; found: 557.2758.

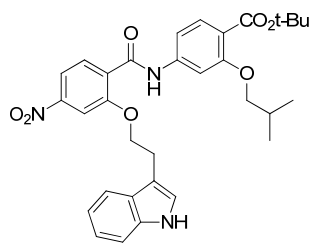

O<sub>2</sub>N-{Trp}-{Leu}-OtBu. <sup>1</sup>H NMR (500 MHz, CDCl<sub>3</sub>, 25 °C) δ 9.77 (s, 1H), 8.44 (d, *J* = 9.0 Hz, 1H), 8.11 (s, 1H), 7.97 (d, *J* = 8.5 Hz, 1H), 7.95 (s, 1H), 7.69 (s, 1H), 7.65 (d, *J* = 8.0 Hz, 1H), 7.43 (d, *J* = 8.5 Hz, 1H), 7.39 (d, *J* = 8.5 Hz, 1H), 7.27 (t, *J* = 8.0 Hz, 1H), 7.19 (t, *J* = 8.0 Hz, 1H), 7.07 (s, 1H), 6.10 (d, *J* = 8.0 Hz, 1H), 4.73 (t, *J* = 6.5 Hz, 2H), 3.71 (d, *J* = 6.5 Hz, 2H), 3.51 (t, *J* = 6.5 Hz, 2H), 2.11 (m, 1H), 1.59 (s, 9H), 1.03 (d, *J* = 7.0 Hz, 6H); HRMS-ESI (*m/z*) calcd for [C<sub>32</sub>H<sub>35</sub>N<sub>3</sub>O<sub>7</sub>+H]<sup>+</sup> 574.2548; found: 574.2546.

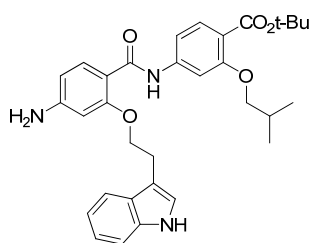

H<sub>2</sub>N-{Trp}-{Leu}-OtBu. <sup>1</sup>H NMR (400 MHz, CDCl<sub>3</sub>-CD<sub>3</sub>OD (1:1), 25 °C) δ 10.03 (s, 1H), 7.88 (d, *J* = 8.4 Hz, 1H), 7.58 (d, *J* = 8.0 Hz, 1H), 7.42 (s, 1H), 7.34 (d, *J* = 8.0 Hz, 1H), 7.24 (d, *J* = 8.4 Hz, 1H), 7.14 (t, *J* = 8.0 Hz, 1H), 7.07 (m, 2H), 6.36 (m, 2H), 6.10 (d, *J* = 8.4 Hz, 1H), 4.54 (t, *J* = 6.4 Hz, 2H), 3.55 (d, *J* = 6.4 Hz, 2H), 3.39 (t, *J* = 6.0 Hz, 2H), 2.01 (m, 1H), 1.53 (s, 9H), 0.95 (d, *J* = 6.8 Hz, 6H); HRMS-ESI (*m/z*) calcd for [C<sub>32</sub>H<sub>37</sub>N<sub>3</sub>O<sub>5</sub>+H]<sup>+</sup> 544.2806; found: 544.2805.

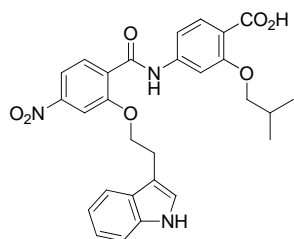

O<sub>2</sub>N-{Trp}-{Leu}-OH. <sup>1</sup>H NMR (600 MHz, DMSO-*d*<sub>6</sub>, 25 °C) δ 12.31 (s, 1H), 10.86 (s, 1H), 10.55 (s, 1H), 7.95 (s, 1H), 7.91 (d, *J* = 7.8 Hz, 1H), 7.84 (d, *J* = 8.4 Hz, 1H), 7.69 (d, *J* = 8.4 Hz, 1H), 7.58 (m, 2H), 7.32 (d, *J* = 8.4 Hz, 1H), 7.20 (m, 2H), 7.04 (t, *J* = 7.8 Hz, 1H), 6.91 (t, *J* = 7.2 Hz, 1H), 4.48 (t, *J* = 6.6 Hz, 2H), 3.75 (d, *J* = 6.6 Hz, 2H), 3.21 (t, *J* = 6.6 Hz, 2H), 2.05 (m, 1H), 0.99 (d, *J* = 6.6 Hz, 6H); HRMS-ESI (*m/z*) calcd for [C<sub>28</sub>H<sub>27</sub>N<sub>3</sub>O<sub>7</sub>+H]<sup>+</sup> 518.1922; found: 518.1924.

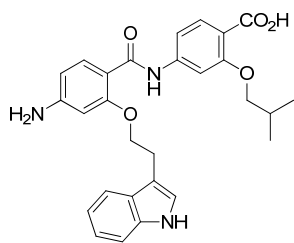

H<sub>2</sub>N-{Trp}-{Leu}-OH. <sup>1</sup>H NMR (600 MHz, DMSO-*d*<sub>6</sub>, 25 °C) δ 12.14 (s, 1H), 10.88 (s, 1H), 9.98 (s, 1H), 7.68 (d, *J* = 8.4 Hz, 1H), 7.63 (d, *J* = 7.8 Hz, 1H), 7.53 (s, 1H), 7.44 (m, 1H), 7.34 (d, *J* = 7.8 Hz, 1H), 7.22 (s, 1H), 7.10 (t, *J* = 7.8 Hz, 1H), 7.00 (t, *J* = 7.8 Hz, 1H), 6.62 (d, *J* = 7.8 Hz, 1H), 6.36 (s, 1H), 6.27 (d, *J* = 7.8 Hz, 1H), 5.92 (s, 2H), 4.42 (t, *J* = 6.6 Hz, 2H), 3.62 (d, *J* = 6.0 Hz, 2H), 3.36 (t, *J* = 6.6 Hz, 2H, partially overlapped with H<sub>2</sub>O peak in DMSO), 1.97 (m, 1H), 0.95 (d, *J* = 6.6 Hz, 6H); HRMS-ESI (*m/z*) calcd for [C<sub>28</sub>H<sub>29</sub>N<sub>3</sub>O<sub>5</sub>+H]<sup>+</sup> 488.2180; found: 418.2185.

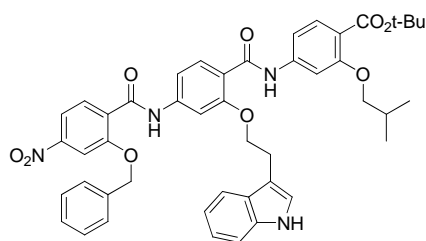

O<sub>2</sub>N-{Phe}-{Trp}-{Leu}-OtBu. <sup>1</sup>H NMR (600 MHz, DMSO-*d*<sub>6</sub>, 25 °C) δ 10.90 (s, 1H), 10.68 (s, 1H), 10.19 (s, 1H), 8.06 (s, 1H), 7.96 (d, *J* = 8.4 Hz, 1H), 7.86 (d, *J* = 7.8 Hz, 1H), 7.80 (d, *J* = 8.4 Hz, 1H), 7.64 (d, *J* = 7.8 Hz, 1H), 7.60 (s, 2H), 7.51 (d, *J* = 7.2 Hz, 2H), 7.47 (d, *J* = 8.4 Hz, 1H), 7.35 (m, 2H), 7.29 (t, *J* = 7.2 Hz, 2H), 7.23 (m, 2H), 7.08 (t, *J* = 7.8 Hz, 1H), 6.97 (t, *J* = 7.8 Hz, 1H), 6.92 (d, *J* = 8.4 Hz, 1H), 5.36 (s, 2H), 4.25 (m, 2H), 3.67 (d, *J* = 5.4 Hz, 2H), 3.33 (2H, overlapped with H<sub>2</sub>O peak in DMSO), 2.02 (m, 1H), 1.51 (s, 9H), 0.99 (d, *J* = 6.6 Hz, 6H); HRMS-ESI (*m/z*) [MH]<sup>+</sup> calcd for [C<sub>46</sub>H<sub>46</sub>N<sub>4</sub>O<sub>9</sub>+H]<sup>+</sup> 799.3337; found: 799.3324.

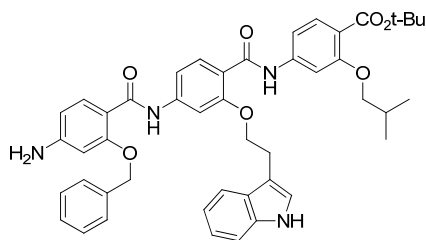

H<sub>2</sub>N-{Phe}-{Trp}-{Leu}-OtBu. <sup>1</sup>H NMR (500 MHz, DMSO-*d*<sub>6</sub>, 25 °C) δ 10.91 (s, 1H), 10.13 (s, 1H), 9.99 (s, 1H), 7.67 (m, 3H), 7.59 (m, 3H), 7.44 (d, *J* = 8.5 Hz, 1H), 7.36 (d, *J* = 8.0 Hz, 1H), 7.31 (t, *J* = 7.5 Hz, 2H), 7.21 (m, 3H), 7.10 (t, *J* = 7.5 Hz, 1H), 7.00 (m, 2H), 6.87 (d, *J* = 8.5 Hz, 1H), 6.42 (s, 1H), 6.29 (d, *J* = 8.5 Hz, 1H), 6.00 (s, 2H), 5.17 (s, 2H), 4.21 (t, *J* = 6.5 Hz, 2H), 3.66 (d, *J* = 6.0 Hz, 2H), 3.33 (2H, overlapped with H<sub>2</sub>O peak in DMSO), 2.01 (m, 1H), 1.50 (s, 9H), 0.98 (d, *J* = 7.0 Hz, 6H); HRMS-ESI (*m/z*) calcd for [C<sub>46</sub>H<sub>48</sub>N<sub>4</sub>O<sub>7</sub>+H]<sup>+</sup> 769.3596; found: 769.3589.

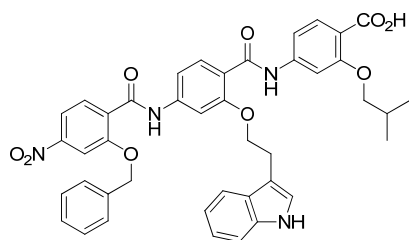

O<sub>2</sub>N-{Phe}-{Trp}-{Leu}-OH. <sup>1</sup>H NMR (600 MHz, DMSO-*d*<sub>6</sub>, 25 °C) δ 12.23 (s, 1H), 10.89 (s, 1H), 10.66 (s, 1H), 10.19 (s, 1H), 8.06 (s, 1H), 7.96 (d, *J* = 7.0 Hz, 1H), 7.87 (d, *J* = 8.4 Hz, 1H), 7.80 (d, *J* = 9.0 Hz, 1H), 7.61 (m, 4H), 7.51 (d, *J* = 7.2 Hz, 2H), 7.36 (d, *J* = 7.8 Hz, 1H), 7.34 (d, *J* = 7.8 Hz, 1H), 7.29 (t, *J* = 7.8 Hz, 2H), 7.23 (m, 2H), 7.08 (t, *J* = 7.8 Hz, 1H), 6.95 (m, 2H), 5.36 (s, 2H), 4.36 (m, 2H), 3.70 (d, *J* = 6.0 Hz, 2H), 3.32 (2H, overlapped with H<sub>2</sub>O peak in DMSO), 2.01 (m, 1H), 0.98 (d, *J* = 6.6 Hz, 6H); HRMS-ESI (*m/z*) calcd for [C<sub>42</sub>H<sub>38</sub>N<sub>4</sub>O<sub>9</sub>+H]<sup>+</sup> 743.2711; found: 743.2721.

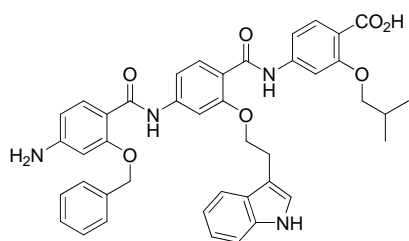

H<sub>2</sub>N-{Phe}-{Trp}-{Leu}-OH. <sup>1</sup>H NMR (600 MHz, DMSO-*d*<sub>6</sub>, 25 °C) δ 12.24 (s, 1H), 10.92 (s, 1H), 10.13 (s, 1H), 9.99 (s, 1H), 7.67 (m, 3H), 7.60 (m, 3H), 7.55 (d, *J* = 7.2 Hz, 1H), 7.36 (d, *J* = 7.8 Hz, 1H), 7.32 (t, *J* = 7.8 Hz, 2H), 7.21 (m, 3H), 7.10 (m, 1H), 6.99 (m, 2H), 6.89 (d, *J* = 7.2 Hz, 1H), 6.42 (s, 1H), 6.29 (d, *J* = 7.8 Hz, 1H), 6.00 (s, 2H), 5.17 (s, 2H), 4.21 (m, 2H), 3.69 (d, *J* = 6.0 Hz, 2H), 3.30 (2H, overlapped with H<sub>2</sub>O peak in DMSO), 2.01 (m, 1H), 0.97 (d, *J* = 6.6 Hz, 6H); HRMS-ESI (*m/z*) calcd for [C<sub>42</sub>H<sub>40</sub>N<sub>4</sub>O<sub>7</sub>+H]<sup>+</sup> 713.2970; found: 713.2970.

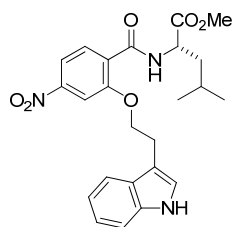

O<sub>2</sub>N-{Trp}-Leu-OMe. <sup>1</sup>H NMR (500 MHz, CDCl<sub>3</sub>, 25 °C) δ 8.38 (d, *J* = 9.0 Hz, 1H), 8.32 (d, *J* = 7.0 Hz, 1H), 8.16 (s, 1H), 7.92 (d, *J* = 9.0 Hz, 1H), 7.87 (s, 1H), 7.65 (d, *J* = 8.0 Hz, 1H), 7.40 (d, *J* = 7.5 Hz, 1H), 7.25 (t, *J* = 8.0 Hz, 1H), 7.18 (m, 2H), 4.77 (m, 1H), 4.61 (m, 2H), 3.76 (s, 3H), 3.47 (t, *J* = 7.0 Hz, 2H), 1.57 (m, 2H), 1.30 (m, 1H), 0.88 (d, *J* = 6.5 Hz, 3H), 0.83 (d, *J* = 6.0 Hz, 3H); HRMS-ESI (*m/z*) calcd for [C<sub>24</sub>H<sub>27</sub>N<sub>3</sub>O<sub>6</sub>+H]<sup>+</sup> 454.1973; found: 454.1968.



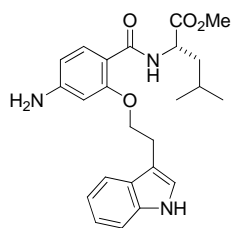

H<sub>2</sub>N-{Trp}-Leu-OMe. <sup>1</sup>H NMR (500 MHz, CDCl<sub>3</sub>, 25 °C) δ 8.76 (s, 1H), 8.29 (d, *J* = 7.0 Hz, 1H), 8.01 (d, *J* = 8.5 Hz, 1H), 7.59 (d, *J* = 8.0 Hz, 1H), 7.36 (d, *J* = 8.0 Hz, 1H), 7.19 (t, *J* = 7.5 Hz, 1H), 7.13 (t, *J* = 7.5 Hz, 1H), 6.99 (s, 1H), 6.23 (d, *J* = 8.0 Hz, 1H), 6.11 (s, 1H), 4.72 (m, 1H), 4.31 (m, 1H), 4.24 (m, 1H), 4.13 (s, 2H), 3.68 (s, 3H), 3.30 (t, *J* = 6.5 Hz, 2H), 1.59 (m, 1H), 1.50 (m, 1H), 1.29 (m, 1H), 0.82 (d, *J* = 6.5 Hz, 3H), 0.79 (d, *J* = 7.0 Hz, 3H); HRMS-ESI (*m/z*) calcd for [C<sub>24</sub>H<sub>29</sub>N<sub>3</sub>O<sub>4</sub>+H]<sup>+</sup> 424.2231; found: 424.2227.

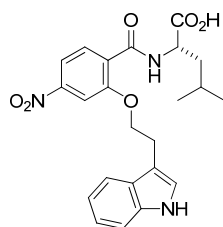

O<sub>2</sub>N-{Trp}-Leu-OH. <sup>1</sup>H NMR (600 MHz, DMSO-*d*<sub>6</sub>, 25 °C) δ 12.86 (s, 1H), 10.91 (s, 1H), 8.60 (d, *J* = 7.8 Hz, 1H), 7.92 (s, 1H), 7.88 (s, 2H), 7.59 (d, *J* = 7.8 Hz, 1H), 7.35 (d, *J* = 8.4 Hz, 1H), 7.29 (s, 1H), 7.08 (t, *J* = 7.8 Hz, 1H), 6.99 (t, *J* = 7.8 Hz, 1H), 4.49 (m, 3H), 3.25 (m, 2H), 1.70 (m, 1H), 1.54 (t, *J* = 6.6 Hz, 2H), 0.85 (d, *J* = 6.0 Hz, 6H); HRMS-ESI (*m/z*) calcd for [C<sub>23</sub>H<sub>25</sub>N<sub>3</sub>O<sub>6</sub>+Na]<sup>+</sup> 462.1635; found: 462.1631.

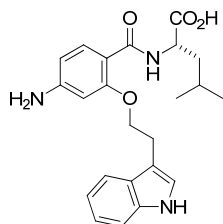

H<sub>2</sub>N-{Trp}-Leu-OH. <sup>1</sup>H NMR (600 MHz, DMSO-*d*<sub>6</sub>, 25 °C) δ 10.91 (s, 1H), 8.12 (d, *J* = 7.2 Hz, 1H), 7.63 (d, *J* = 8.4 Hz, 1H), 7.58 (d, *J* = 7.8 Hz, 1H), 7.35 (d, *J* = 8.4 Hz, 1H), 7.24 (s, 1H), 7.08 (t, *J* = 7.8 Hz, 1H), 6.99 (t, *J* = 7.2 Hz, 1H), 6.30 (s, 1H), 6.20 (d, *J* = 9.0 Hz, 1H), 5.74 (s, 2H), 4.41 (m, 1H), 4.32 (m, 2H), 3.26 (m, 2H), 1.57 (m, 1H), 1.47 (m, 1H), 1.36 (m, 1H), 0.80 (t, *J* = 6.6 Hz, 6H); HRMS-ESI (*m/z*) calcd for [C<sub>23</sub>H<sub>27</sub>N<sub>3</sub>O<sub>4</sub>+Na]<sup>+</sup> 432.1894; found: 432.1897.

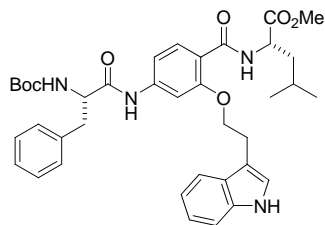

Boc-Phe-{Trp}-Leu-OMe.  $^1\text{H}$  NMR (400 MHz,  $\text{CDCl}_3$ , 25  $^\circ\text{C}$ )  $\delta$  8.28 (m, 3H), 8.08 (d,  $J = 8.4$  Hz, 1H), 7.62 (m, 2H), 7.38 (d,  $J = 8.0$  Hz, 1H), 7.26 (m, 6H), 7.14 (t,  $J = 7.6$  Hz, 1H), 7.02 (s, 1H), 6.70 (d,  $J = 8.4$  Hz, 1H), 5.16 (s, 1H), 4.69 (m, 1H), 4.45 (m, 3H), 3.71 (s, 3H), 3.34 (t,  $J = 6.4$  Hz, 2H), 3.14 (m, 2H), 1.53 (m, 1H), 1.41 (s, 10H), 1.17 (m, 1H), 0.80 (d,  $J = 6.4$  Hz, 3H), 0.76 (d,  $J = 6.4$  Hz, 3H); HRMS-ESI ( $m/z$ ) calcd for  $[\text{C}_{38}\text{H}_{46}\text{N}_4\text{O}_7+\text{H}]^+$  671.3439; found: 671.3433.

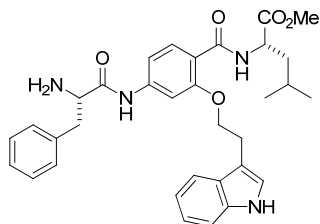

$\text{H}_2\text{N}$ -Phe-{Trp}-Leu-OMe.  $^1\text{H}$  NMR (600 MHz,  $\text{DMSO}-d_6$ , 25  $^\circ\text{C}$ )  $\delta$  10.94 (s, 1H), 10.71 (s, 1H), 8.31 (s, 3H), 8.26 (d,  $J = 7.8$  Hz, 1H), 7.83 (d,  $J = 8.4$  Hz, 1H), 7.59 (d,  $J = 7.8$  Hz, 1H), 7.45 (s, 1H), 7.37 (d,  $J = 7.8$  Hz, 1H), 7.27 (m, 7H), 7.09 (t,  $J = 7.2$  Hz, 1H), 7.00 (t,  $J = 7.2$  Hz, 1H), 4.48 (m, 1H), 4.37 (m, 2H), 4.16 (s, 1H), 3.65 (s, 3H), 3.30 (m, 2H), 3.17 (m, 1H), 3.09 (m, 1H), 1.57 (m, 1H), 1.41 (m, 2H), 0.80 (d,  $J = 6.0$  Hz, 6H); HRMS-ESI ( $m/z$ ) calcd for  $[\text{C}_{33}\text{H}_{38}\text{N}_4\text{O}_5+\text{H}]^+$  571.2915; found: 571.2894.

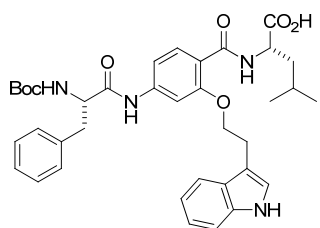

Boc-Phe-{Trp}-Leu-OH.  $^1\text{H}$  NMR (600 MHz,  $\text{DMSO}-d_6$ , 25  $^\circ\text{C}$ )  $\delta$  12.79 (s, 1H), 10.92 (s, 1H), 10.25 (s, 1H), 8.32 (d,  $J = 6.6$  Hz, 1H), 7.85 (d,  $J = 9.0$  Hz, 1H), 7.60 (d,  $J = 7.8$  Hz, 1H), 7.50 (s, 1H), 7.36 (d,  $J = 8.4$  Hz, 1H), 7.28 (m, 5H), 7.18 (m, 2H), 7.08 (t,  $J = 7.8$  Hz, 1H), 7.00 (t,  $J = 7.8$  Hz, 1H), 4.37 (m, 4H), 3.30 (m, 2H), 2.98 (m, 1H), 2.82 (m, 1H), 1.61 (m, 1H), 1.51 (m, 1H), 1.43 (m, 1H), 1.30 (s, 9H), 0.82 (t,  $J = 6.6$  Hz, 6H); HRMS-ESI ( $m/z$ ) calcd for  $[\text{C}_{37}\text{H}_{44}\text{N}_4\text{O}_7+\text{H}]^+$  657.3283; found: 657.3281.

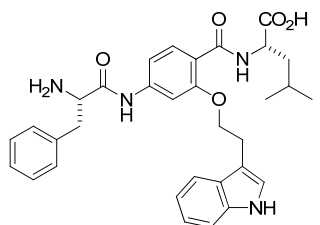

$\text{H}_2\text{N}$ -Phe-{Trp}-Leu-OH.  $^1\text{H}$  NMR (600 MHz,  $\text{DMSO}-d_6$ , 25  $^\circ\text{C}$ )  $\delta$  10.91 (s, 1H), 8.36 (s, 1H), 7.83 (d,  $J = 8.4$  Hz, 1H), 7.60 (m, 2H), 7.23 (m, 9H), 7.08 (t,  $J = 7.2$  Hz, 1H), 7.00 (t,  $J = 7.2$  Hz, 1H), 4.36 (m, 3H), 3.57 (m, 1H), 3.00 (m, 3H), 2.71 (m, 1H), 1.52 (m, 3H), 0.83 (t,  $J = 6.6$  Hz, 6H); HRMS-ESI ( $m/z$ ) calcd for  $[\text{C}_{32}\text{H}_{36}\text{N}_4\text{O}_5+\text{H}]^+$  557.2758; found: 557.2751.

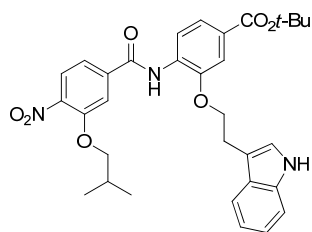

O<sub>2</sub>N-[Leu]-[Trp]-OtBu. <sup>1</sup>H NMR (500 MHz, CDCl<sub>3</sub>, 25 °C) δ 8.57 (s, 1H), 8.51 (d, *J* = 8.5 Hz, 1H), 8.02 (s, 1H), 7.70 (dd, *J* = 8.5, 1.5 Hz, 1H), 7.66 (d, *J* = 1.8 Hz, 1H), 7.62 (d, *J* = 8.1 Hz, 1H), 7.56 (d, *J* = 1.5 Hz, 1H), 7.52 (d, *J* = 8.4 Hz, 1H), 7.36 (d, *J* = 8.5 Hz, 1H), 7.22 (t, *J* = 7.4 Hz, 1H), 7.11 (t, *J* = 7.4 Hz, 1H), 7.03 (d, *J* = 2.2 Hz, 1H), 6.71 (dd, *J* = 8.5, 1.5 Hz, 1H), 4.57 (t, *J* = 6.6 Hz, 2H), 3.87 (d, *J* = 6.6 Hz, 2H), 3.33 (t, *J* = 6.6 Hz, 2H), 2.14 (septet, *J* = 6.6 Hz, 1H), 1.62 (s, 9H), 1.04 (d, *J* = 6.6 Hz, 6H); <sup>13</sup>C NMR (125 MHz, CDCl<sub>3</sub>, 25 °C) δ 165.5, 163.2, 152.8, 147.0, 141.7, 139.7, 136.5, 131.6, 128.1, 127.6, 125.8, 123.6, 122.8, 121.9, 120.0, 118.9, 118.7, 117.0, 114.3, 112.5, 112.2, 111.6, 81.5, 76.2, 68.8, 28.5, 28.4, 25.5, 19.2; MALDI-FTMS (*m/z*) calcd for [C<sub>32</sub>H<sub>35</sub>N<sub>3</sub>O<sub>7</sub>+Na]<sup>+</sup> 596.2367; found: 596.2346.

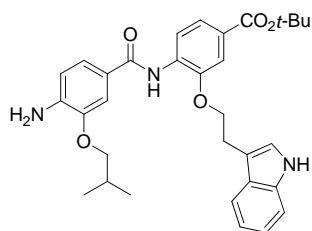

H<sub>2</sub>N-[Leu]-[Trp]-OtBu. <sup>1</sup>H NMR (500 MHz, CDCl<sub>3</sub>, 25 °C) δ 8.62 (s, 1H), 8.56 (d, *J* = 8.5 Hz, 1H), 8.16 (s, 1H), 7.68 (dd, *J* = 8.5, 1.5 Hz, 1H), 7.63 (d, *J* = 8.1 Hz, 1H), 7.60 (d, *J* = 1.5 Hz, 1H), 7.40 (d, *J* = 1.5 Hz, 1H), 7.36 (d, *J* = 8.1 Hz, 1H), 7.20 (t, *J* = 7.4 Hz, 1H), 7.12 (t, *J* = 7.4 Hz, 1H), 7.03 (d, *J* = 1.9 Hz, 1H), 6.88 (dd, *J* = 8.4, 1.5 Hz, 1H), 6.66 (d, *J* = 8.1 Hz, 2H), 4.49 (t, *J* = 6.6 Hz, 2H), 3.79 (d, *J* = 6.6 Hz, 2H), 3.33 (t, *J* = 6.6 Hz, 2H), 2.13 (septet, *J* = 6.6 Hz, 1H), 1.61 (s, 9H), 1.01 (d, *J* = 6.6 Hz, 6H); <sup>13</sup>C NMR (125 MHz, CDCl<sub>3</sub>, 25 °C) δ 165.8, 164.9, 146.8, 136.5, 132.4, 127.4, 127.0, 123.6, 122.4, 122.3, 119.8, 119.3, 118.7, 118.5, 112.2, 112.0, 111.6, 111.3, 81.2, 75.3, 68.6, 28.5, 28.4, 25.7, 19.5; MALDI-FTMS (*m/z*) calcd for [C<sub>32</sub>H<sub>37</sub>N<sub>3</sub>O<sub>5</sub>+H]<sup>+</sup> 544.2806; found: 544.2806.

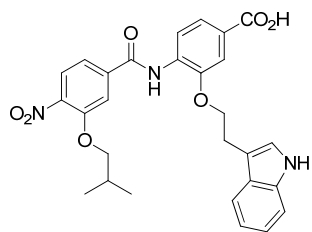

O<sub>2</sub>N-[Leu]-[Trp]-OH. <sup>1</sup>H NMR (500 MHz, acetone-*d*<sub>6</sub>, 25 °C) δ 8.50 (d, *J* = 8.8 Hz, 1H), 7.83 (d, *J* = 8.5 Hz, 1H), 7.73 (m, 3H), 7.65 (d, *J* = 8.1 Hz, 1H), 7.36 (d, *J* = 8.1 Hz, 1H), 7.32 (s, 1H), 7.27 (dd, *J* = 8.5, 1.5 Hz, 1H), 7.08 (t, *J* = 7.5 Hz, 1H), 6.96 (t, *J* = 7.3 Hz, 1H), 4.60 (t, *J* = 6.6 Hz, 2H), 4.02 (d, *J* = 6.6 Hz, 2H), 3.38 (t, *J* = 6.6 Hz, 2H), 2.10 (septet, *J* = 6.6 Hz, 1H), 1.03 (d, *J* = 7.0 Hz, 6H); <sup>13</sup>C NMR (125 MHz, acetone-*d*<sub>6</sub>, 25 °C) δ 167.2, 164.1, 152.9, 148.7, 142.9, 140.6, 137.6, 133.0, 128.6, 127.2, 126.2, 124.0, 123.7, 122.4, 120.0, 119.7, 119.3, 119.2, 114.8, 113.5, 112.3, 112.1, 76.6, 70.0, 29.0, 25.9,

19.3; MALDI-FTMS ( $m/z$ ) calcd for  $[C_{28}H_{27}N_3O_7+Na]^+$  540.1741; found: 540.1753.

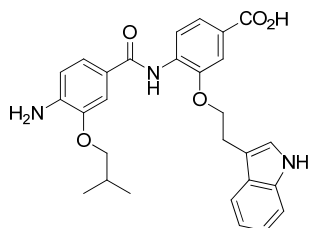

$H_2N$ -[Leu]-[Trp]-OH.  $^1H$  NMR (500 MHz,  $CD_3OD$ , 25 °C)  $\delta$  8.30 (d,  $J$  = 8.5 Hz, 1H), 7.75 (d,  $J$  = 1.5 Hz, 1H), 7.71 (dd,  $J$  = 8.5, 1.5 Hz, 1H), 7.57 (d,  $J$  = 8.1 Hz, 1H) 7.51 (d,  $J$  = 1.9 Hz, 1H), 7.29 (d,  $J$  = 8.1 Hz, 1H), 7.20 (d,  $J$  = 8.1 Hz, 1H), 7.10 (m, 2H), 7.07 (t,  $J$  = 7.5 Hz, 1H), 6.93 (t,  $J$  = 7.5 Hz, 1H), 4.54 (t,  $J$  = 6.6 Hz, 2H), 3.85 (t,  $J$  = 6.6 Hz, 2H), 3.31 (d,  $J$  = 6.6 Hz, 2H), 2.14 (septet,  $J$  = 6.6 Hz, 1H), 1.05 (d,  $J$  = 6.6 Hz, 6H);  $^{13}C$  NMR (125 MHz,  $CD_3OD$ , 25 °C)  $\delta$  169.5, 166.5, 152.8, 149.9, 138.2, 133.2, 129.0, 128.3, 124.2, 123.7, 123.4, 122.6, 121.7, 120.9, 120.0, 119.4, 114.1, 112.9, 112.5, 112.4, 76.7, 70.5, 29.5, 26.2, 19.6; ESI-TOFMS ( $m/z$ ) calcd for  $[C_{28}H_{29}N_3O_5+H]^+$  488.2180; found: 488.2174.

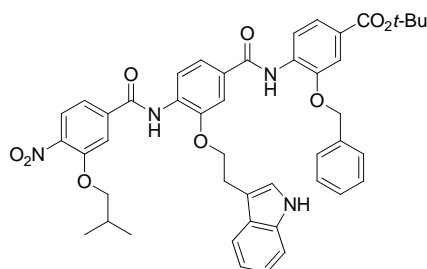

$O_2N$ -[Leu]-[Trp]-[Phe]-OtBu.  $^1H$  NMR (500 MHz,  $CD_3OD$ , 25 °C)  $\delta$  8.83 (s, 1H), 8.62 (d,  $J$  = 8.5 Hz, 1H), 8.55 (s, 1H), 8.51 (d,  $J$  = 8.5 Hz, 1H), 8.02 (s, 1H), 7.73 (dd,  $J$  = 8.4, 1.9 Hz, 1H), 7.69 (d,  $J$  = 1.5 Hz, 1H), 7.62 (d,  $J$  = 1.9 Hz, 1H), 7.61 (d,  $J$  = 7.7 Hz, 1H), 7.56 (d,  $J$  = 1.5 Hz, 1H), 7.51 (d,  $J$  = 8.5 Hz, 1H), 7.46 (m, 4H), 7.40 (d,  $J$  = 7.3 Hz, 1H), 7.36 (m, 2H), 7.22 (t,  $J$  = 7.5 Hz, 1H), 7.11 (t,  $J$  = 7.2 Hz, 1H), 7.02 (d,  $J$  = 2.2 Hz, 1H), 6.67 (dd,  $J$  = 8.4, 1.9 Hz, 1H), 5.23 (s, 2H), 4.52 (t,  $J$  = 6.2 Hz, 2H), 3.88 (d,  $J$  = 6.6 Hz, 2H), 3.32 (t,  $J$  = 6.2 Hz, 2H), 2.15 (septet,  $J$  = 6.6 Hz, 1H), 1.62 (s, 9H), 1.05 (d,  $J$  = 6.6 Hz, 6H); ESI-TOFMS ( $m/z$ ) calcd for  $[C_{46}H_{46}N_4O_9+H]^+$  799.3337; found: 799.3345.

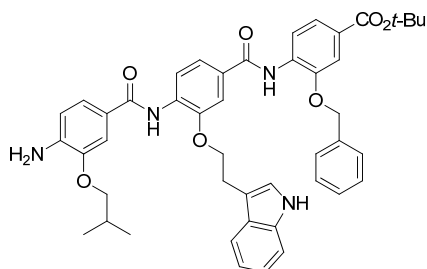

$H_2N$ -[Leu]-[Trp]-[Phe]-OtBu.  $^1H$  NMR (400 MHz,  $CDCl_3$ , 25 °C)  $\delta$  8.83 (s, 1H), 8.63 (d,  $J$  = 8.2 Hz, 1H), 8.62 (s, 1H), 8.57 (d,  $J$  = 8.5 Hz, 1H), 8.04 (s, 1H), 7.72 (dd,  $J$  = 8.5, 1.5 Hz, 1H), 7.68 (d,  $J$  = 1.4 Hz, 1H), 7.64 (d,  $J$  = 7.9 Hz, 1H), 7.58 (d,  $J$  = 1.5 Hz, 1H), 7.42 (m, 7H), 7.31 (d,  $J$  = 8.5, 1.5 Hz, 1H), 7.23 (t,  $J$  = 7.3 Hz, 1H), 7.13 (t,  $J$  = 7.3 Hz, 1H), 7.03 (d,  $J$  = 1.8 Hz, 1H), 6.87 (dd,  $J$  = 8.2, 1.5 Hz, 1H), 6.49 (d,  $J$  = 7.9, 1.9 Hz, 1H), 5.21 (s, 2H), 4.46 (t,  $J$  = 6.4 Hz, 2H), 3.79 (d,  $J$  = 6.7 Hz, 2H), 3.33 (t,  $J$  =

6.4 Hz, 2H), 2.12 (septet,  $J = 6.7$  Hz, 1H), 1.62 (s, 9H), 1.03 (d,  $J = 6.8$  Hz, 6H); ESI-TOFMS ( $m/z$ ) calcd for  $[\text{C}_{46}\text{H}_{48}\text{N}_4\text{O}_7+\text{H}]^+$  769.3596; found: 769.3581.

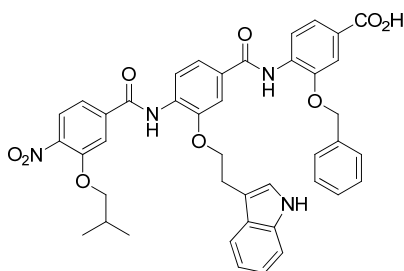

$\text{O}_2\text{N}$ -[Leu]-[Trp]-[Phe]-OH.  $^1\text{H}$  NMR (400 MHz, acetone- $d_6$ , 25 °C)  $\delta$  10.13 (s, 1H), 9.10 (s, 1H), 9.00 (s, 1H), 8.58 (dd,  $J = 6.5, 1.8$  Hz, 1H), 8.50 (dd,  $J = 6.7, 1.8$  Hz, 1H), 7.88 (s, 1H), 7.84 (d,  $J = 8.2$  Hz, 1H), 7.77 (dd,  $J = 10.0, 1.6$  Hz, 1H), 7.72 (d,  $J = 1.6$  Hz, 1H), 7.68 (d,  $J = 1.8$  Hz, 1H), 7.64 (m, 3H), 7.59 (dd,  $J = 8.6, 1.7$  Hz, 1H), 7.42 (t,  $J = 7.3$  Hz, 2H), 7.36 (m, 2H), 7.33 (m, 1H), 7.28 (dd,  $J = 8.4, 1.5$  Hz, 1H), 7.08 (t,  $J = 7.6$  Hz, 1H), 6.96 (td,  $J = 7.5, 0.9$  Hz, 1H), 5.36 (s, 2H), 4.54 (t,  $J = 6.1$  Hz, 2H), 4.03 (d,  $J = 6.3$  Hz, 2H), 3.38 (t,  $J = 6.1$  Hz, 2H), 1.03 (d,  $J = 6.8$  Hz, 6H); ESI-TOFMS ( $m/z$ ) calcd for  $[\text{C}_{42}\text{H}_{38}\text{N}_4\text{O}_9+\text{H}]^+$  743.2711; found: 743.2708.

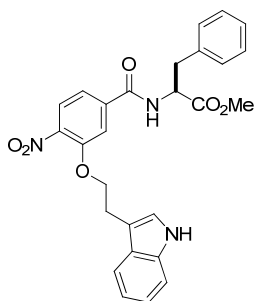

$\text{O}_2\text{N}$ -[Trp]-Phe-OMe.  $^1\text{H}$  NMR (400 MHz,  $\text{CDCl}_3$ , 25 °C)  $\delta$  8.11 (s, 1H), 7.80 (d,  $J = 8.2$  Hz, 1H), 7.63 (d,  $J = 7.6$  Hz, 1H), 7.43 (s, 1H), 7.37 (d,  $J = 7.9$  Hz, 1H), 7.19 (m, 6H), 7.08 (d,  $J = 7.3$  Hz, 2H), 6.50 (d,  $J = 7.4$  Hz, 1H), 5.04 (m, 1H), 4.38 (t,  $J = 6.5$  Hz, 2H), 3.80 (s, 3H), 3.33 (t,  $J = 6.5$  Hz, 2H), 3.25 (m, 2H);  $^{13}\text{C}$  NMR (125 MHz,  $\text{CDCl}_3$ , 25 °C)  $\delta$  172.0, 165.1, 152.5, 141.7, 139.0, 136.2, 135.7, 129.4, 128.9, 127.6, 127.4, 125.8, 123.2, 122.3, 119.7, 118.6, 118.0, 114.0, 111.6, 111.4, 70.2, 53.8, 52.9, 37.8, 25.1; ESI-TOFMS ( $m/z$ ) calcd for  $[\text{C}_{27}\text{H}_{25}\text{N}_3\text{O}_6+\text{H}]^+$  488.1816; found: 488.1815.

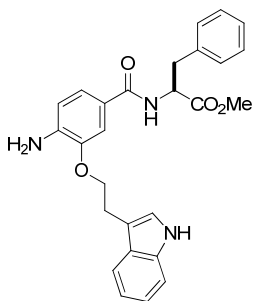

$\text{H}_2\text{N}$ -[Trp]-Phe-OMe.  $^1\text{H}$  NMR (500 MHz,  $\text{CDCl}_3$ , 25 °C)  $\delta$  8.15 (s, 1H), 7.80 (d,  $J = 7.7$  Hz, 1H), 7.38 (d,  $J = 8.1$  Hz, 1H), 7.28 (d,  $J = 1.5$  Hz, 1H), 7.22 (m, 4H), 7.12 (m, 5H), 6.64 (s, 1H), 6.44 (d,  $J = 7.7$  Hz, 1H), 5.06 (m, 1H), 4.30 (t,  $J = 6.6$  Hz, 2H), 3.75 (s, 3H), 3.28 (t,  $J = 6.6$  Hz, 2H), 3.23 (m, 2H);  $^{13}\text{C}$

NMR (125 MHz, CDCl<sub>3</sub>, 25 °C) δ 172.6, 167.0, 146.2, 140.2, 136.4, 136.2, 129.5, 128.8, 127.8, 127.3, 123.5, 122.3, 122.2, 120.3, 119.6, 118.8, 113.6, 112.6, 111.5, 110.9, 68.9, 53.6, 52.6, 38.2, 25.5; ESI-TOFMS (*m/z*) calcd for [C<sub>27</sub>H<sub>25</sub>N<sub>3</sub>O<sub>6</sub>+H]<sup>+</sup> 458.2074; found: 458.2075.

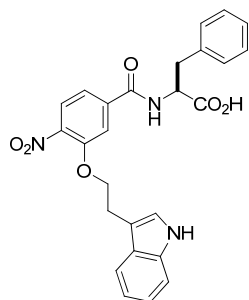

O<sub>2</sub>N-[Trp]-Phe-OH. <sup>1</sup>H NMR (500 MHz, acetone-*d*<sub>6</sub>, 25 °C) δ 10.12 (s, 1H), 8.07 (d, *J* = 7.7 Hz, 1H), 7.86 (d, *J* = 8.4 Hz, 1H), 7.66 (d, *J* = 8.1 Hz, 1H), 7.65 (s, 1H), 7.50 (d, *J* = 8.4 Hz, 1H), 7.40 (d, *J* = 8.4 Hz, 1H), 7.31 (m, 3H), 7.21 (t, *J* = 7.7 Hz, 1H), 7.11 (q, *J* = 7.3 Hz, 2H), 7.04 (t, *J* = 7.7 Hz, 1H), 4.88 (m, 1H), 4.43 (t, *J* = 7.0 Hz, 2H), 3.31 (m, 1H), 3.29 (t, *J* = 7.0 Hz, 2H), 3.09 (m, 1H); <sup>13</sup>C NMR (125 MHz, acetone-*d*<sub>6</sub>, 25 °C) δ 173.6, 166.3, 152.9, 140.8, 139.1, 138.2, 130.7, 129.8, 129.1, 128.0, 126.3, 124.8, 122.8, 120.6, 120.2, 119.8, 115.2, 112.8, 112.0, 71.5, 55.7, 38.4, 26.2; ESI-TOFMS (*m/z*) calcd for [C<sub>26</sub>H<sub>23</sub>N<sub>3</sub>O<sub>6</sub>+H]<sup>+</sup> 474.1660; found: 474.1653.

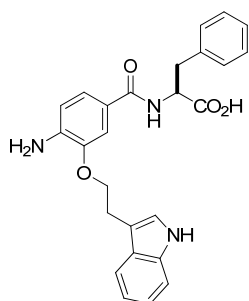

H<sub>2</sub>N-[Trp]-Phe-OH. <sup>1</sup>H NMR (500 MHz, CD<sub>3</sub>OD, 25 °C) δ 7.62 (d, *J* = 8.1 Hz, 1H), 7.35 (d, *J* = 8.1 Hz, 1H), 7.20 (m, 7H), 7.09 (q, *J* = 7.4 Hz, 2H), 7.03 (t, *J* = 7.4 Hz, 1H), 6.66 (d, *J* = 8.1 Hz, 1H), 4.77 (m, 1H), 4.26 (m, 2H), 3.31 (m, 1H), 3.27 (t, *J* = 6.6 Hz, 2H), 3.10 (m, 1H); <sup>13</sup>C NMR (125 MHz, CD<sub>3</sub>OD, 25 °C) δ 147.1, 142.9, 139.0, 138.3, 130.5, 129.5, 129.2, 127.8, 123.9, 123.7, 122.5(2C), 119.9, 119.4, 114.6, 112.6, 112.4, 111.8, 70.5, 56.0, 38.5, 26.5; ESI-TOFMS (*m/z*) calcd for [C<sub>26</sub>H<sub>25</sub>N<sub>3</sub>O<sub>4</sub>+H]<sup>+</sup> 444.1918; found: 444.1913.

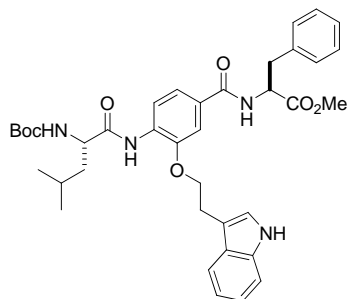

Boc-Leu-[Trp]-Phe-OMe.  $^1\text{H}$  NMR (500 MHz,  $\text{CDCl}_3$ , 25 °C)  $\delta$  8.62 (s, 1H), 8.37 (s, 1H), 8.35 (s, 1H), 7.62 (d,  $J = 7.7$  Hz, 1H), 7.43 (s, 1H), 7.38 (d,  $J = 8.1$  Hz, 1H), 7.23 (m, 6H), 7.12 (t,  $J = 7.1$  Hz, 3H), 6.51 (d,  $J = 7.7$  Hz, 1H), 5.05 (m, 1H), 4.44 (m, 1H), 4.36 (m, 1H), 4.21 (m, 1H), 3.77 (s, 3H), 3.31 (m, 2H), 3.24 (m, 2H), 1.66 (m, 2H), 1.59 (m, 1H), 1.50 (s, 9H), 0.94 (dd,  $J = 6.1, 2.4$  Hz, 6H);  $^{13}\text{C}$  NMR (125 MHz,  $\text{CDCl}_3$ , 25 °C)  $\delta$  172.3, 171.0, 166.3, 155.9, 147.4, 136.6, 136.0, 131.2, 129.5, 129.2, 128.9, 127.5, 122.7, 122.4, 119.7, 119.5, 118.9, 118.7, 112.1, 111.7, 111.2, 68.8, 54.3, 53.7, 52.7, 42.0, 38.1, 28.6, 25.5, 25.0, 23.1, 22.2; ESI-TOFMS ( $m/z$ ) calcd for  $[\text{C}_{38}\text{H}_{46}\text{N}_4\text{O}_7+\text{H}]^+$  671.3439; found: 671.3428.

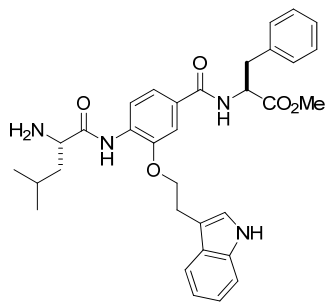

$\text{H}_2\text{N}$ -Leu-[Trp]-Phe-OMe.  $^1\text{H}$  NMR (400 MHz,  $\text{CDCl}_3$ , 25 °C)  $\delta$  10.04 (s, 1H), 8.45 (d,  $J = 8.2$  Hz, 1H), 8.13 (s, 1H), 7.64 (d,  $J = 7.9$  Hz, 1H), 7.42 (d,  $J = 1.8$  Hz, 1H), 7.39 (d,  $J = 8.2$  Hz, 1H), 7.23 (s, 5H), 7.13 (m, 4H), 6.53 (d,  $J = 7.6$  Hz, 1H), 5.06 (m, 1H), 4.40 (td,  $J = 6.7, 1.8$  Hz, 2H), 3.77 (s, 3H), 3.44 (m, 1H), 3.31 (t,  $J = 6.7$  Hz, 2H), 3.24 (m, 2H), 1.76 (m, 3H), 1.26 (s, 6H), 0.97 (dd,  $J = 11.6, 6.0$  Hz, 6H);  $^{13}\text{C}$  NMR (100 MHz,  $\text{CDCl}_3$ , 25 °C)  $\delta$  174.4, 172.3, 166.6, 147.8, 136.4, 136.0, 131.4, 129.5, 128.9, 128.8, 127.7, 122.5, 122.4, 119.7, 119.5, 118.9, 118.7, 112.3, 111.4, 110.8, 69.0, 54.5, 53.7, 52.6, 44.1, 38.1, 29.9, 25.4, 25.2, 23.6, 21.5; ESI-TOFMS ( $m/z$ ) calcd for  $[\text{C}_{33}\text{H}_{38}\text{N}_4\text{O}_5+\text{H}]^+$  571.2915; found: 571.2912.

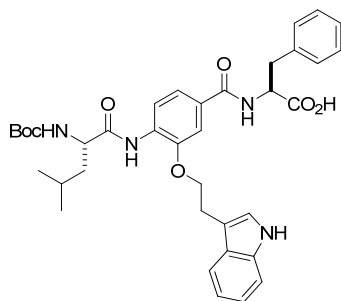

Boc-Leu-[Trp]-Phe-OH.  $^1\text{H}$  NMR (500 MHz,  $\text{acetone-}d_6$ , 25 °C)  $\delta$  10.12 (s, 1H), 9.10 (s, 1H), 8.42 (d,  $J = 8.5$  Hz, 1H), 7.73 (d,  $J = 8.1$  Hz, 1H), 7.67 (d,  $J = 7.7$  Hz, 1H), 7.49 (d,  $J = 1.5$  Hz, 1H), 7.45 (dd,  $J = 8.4, 1.8$  Hz, 1H), 7.42 (d,  $J = 8.1$  Hz, 1H), 7.38 (d,  $J = 2.2$  Hz, 1H), 7.32 (d,  $J = 7.0$  Hz, 1H), 7.22 (t,  $J = 7.5$  Hz, 2H), 7.13 (m, 2H), 7.06 (t,  $J = 7.0$  Hz, 1H), 6.50 (m, 1H), 4.87 (m, 1H), 4.36 (m, 1H), 4.28 (m, 1H), 3.37 (t,  $J = 7.1$  Hz, 2H), 3.29 (m, 1H), 3.09 (m, 1H), 1.74 (m, 2H), 1.64 (m, 1H), 1.45 (s, 9H), 0.95 (t,  $J = 6.3$  Hz, 6H);  $^{13}\text{C}$  NMR (125 MHz,  $\text{acetone-}d_6$ , 25 °C)  $\delta$  173.3, 172.0, 166.9, 148.1, 138.7, 137.8, 131.9, 130.2, 129.2, 128.6, 127.5, 124.2, 122.3, 121.1, 119.8, 119.2, 119.1, 112.4, 111.6, 111.4, 70.1, 55.2, 55.0, 41.1, 38.0, 28.7, 26.2, 25.7, 23.5, 21.9; ESI-TOFMS ( $m/z$ ) calcd for  $[\text{C}_{37}\text{H}_{44}\text{N}_4\text{O}_7+\text{H}]^+$  657.3283; found: 657.3282.

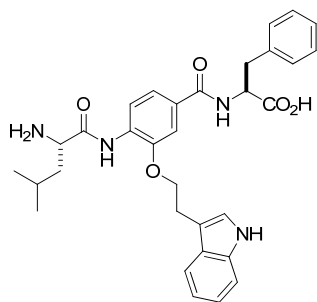

H<sub>2</sub>N-Leu-[Trp]-Phe-OH. <sup>1</sup>H NMR (400 MHz, CD<sub>3</sub>OD, 25 °C) δ 8.09 (d, *J* = 8.2 Hz, 1H), 7.57 (d, *J* = 7.9 Hz, 1H), 7.39 (d, *J* = 1.5 Hz, 1H), 7.36 (m, 1H), 7.35 (dd, *J* = 8.2, 1.8 Hz, 1H), 7.25 (d, *J* = 7.0 Hz, 2H), 7.10 (m, 6H), 4.82 (m, 1H), 4.40 (t, *J* = 7.2 Hz, 2H), 3.98 (m, 1H), 3.34 (t, *J* = 6.7 Hz, 2H), 3.09 (dd, *J* = 13.8, 9.7 Hz, 1H), 1.68 (m, 3H), 0.94 (t, *J* = 2.9 Hz, 6H); <sup>13</sup>C NMR (100 MHz, CD<sub>3</sub>OD, 25 °C) δ 169.6, 150.4, 138.9, 138.3, 132.6, 130.8, 130.4, 129.6, 129.1, 127.9, 123.9, 122.7, 120.0, 119.3, 112.6, 112.0, 70.7, 38.3, 30.9, 26.3, 23.1, 22.5; ESI-TOFMS (*m/z*) calcd for [C<sub>32</sub>H<sub>36</sub>N<sub>4</sub>O<sub>5</sub>+H]<sup>+</sup> 557.2758; found: 557.2754.

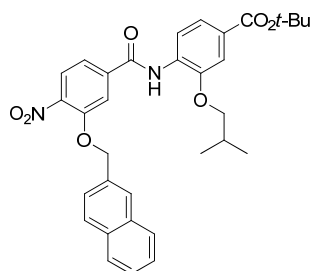

O<sub>2</sub>N-[Nap]-[Leu]-OtBu. <sup>1</sup>H NMR (500 MHz, CDCl<sub>3</sub>, 25 °C) δ 8.77 (s, 1H), 8.55 (d, *J* = 8.5 Hz, 1H), 7.98 (d, *J* = 8.0 Hz, 1H), 7.95 (s, 1H), 7.87 (m, 4H), 7.68 (d, *J* = 7.0 Hz, 1H), 7.57 (d, *J* = 8.5 Hz, 1H), 7.55 (s, 1H), 7.51 (m, 2H), 7.41 (d, *J* = 7.0 Hz, 1H), 5.49 (s, 2H), 3.92 (d, *J* = 6.5 Hz, 2H), 2.18 (m, 1H), 1.61 (s, 9H), 1.08 (d, *J* = 7.0 Hz); HRMS-ESI (*m/z*) calcd for [C<sub>33</sub>H<sub>34</sub>N<sub>2</sub>O<sub>7</sub>+H]<sup>+</sup> 571.2439; found: 571.2431.

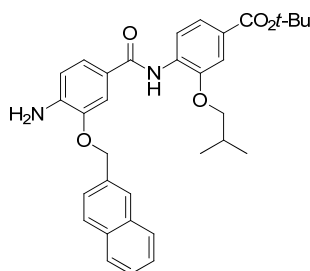

H<sub>2</sub>N-[Nap]-[Leu]-OtBu. <sup>1</sup>H NMR (600 MHz, CDCl<sub>3</sub>, 25 °C) δ 8.70 (s, 1H), 8.59 (d, *J* = 8.4 Hz, 1H), 7.98 (s, 1H), 7.89 (m, 1H), 7.83 (d, *J* = 8.4 Hz, 1H), 7.72 (s, 2H), 7.68 (d, *J* = 8.4 Hz, 1H), 7.61 (s, 1H), 7.53 (m, 3H), 7.40 (m, 2H), 7.18 (s, 2H), 5.24 (s, 2H), 3.92 (d, *J* = 6.6 Hz, 2H), 2.18 (m, 1H), 1.61 (s, 9H), 1.08 (d, *J* = 6.6 Hz, 6H); HRMS-ESI (*m/z*) calcd for [C<sub>33</sub>H<sub>36</sub>N<sub>2</sub>O<sub>5</sub>+H]<sup>+</sup> 541.2697; found: 541.2688.



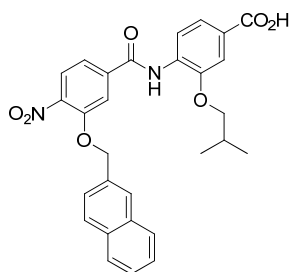

O<sub>2</sub>N-[Nap]-[Leu]-OH. <sup>1</sup>H NMR (500 MHz, DMSO-*d*<sub>6</sub>, 25 °C) δ 12.92 (s, 1H), 9.84 (s, 1H), 8.09 (d, *J* = 8.0 Hz, 1H), 7.96 (m, 6H), 7.67 (d, *J* = 8.5 Hz, 1H), 7.58 (m, 5H), 5.58 (s, 2H), 3.87 (d, *J* = 6.0 Hz, 2H), 2.05 (m, 1H), 0.96 (d, *J* = 6.5 Hz, 6H); HRMS-ESI (*m/z*) calcd for [C<sub>29</sub>H<sub>26</sub>N<sub>2</sub>O<sub>7</sub>+H]<sup>+</sup> 515.1813; found: 515.1816.

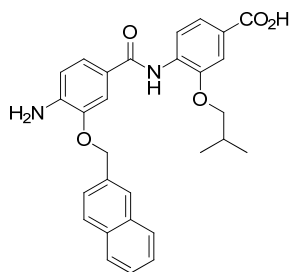

H<sub>2</sub>N-[Nap]-[Leu]-OH. <sup>1</sup>H NMR (600 MHz, CD<sub>2</sub>Cl<sub>2</sub>-CD<sub>3</sub>OD (1:1), 25 °C) δ 8.55 (s, 1H), 7.93 (m, 12H), 5.67 (s, 2H), 4.10 (m, 2H), 2.36 (m, 1H), 1.24 (m, 6H); HRMS-ESI (*m/z*) calcd for [C<sub>29</sub>H<sub>28</sub>N<sub>2</sub>O<sub>5</sub>+H]<sup>+</sup> 485.2071; found: 485.2075.

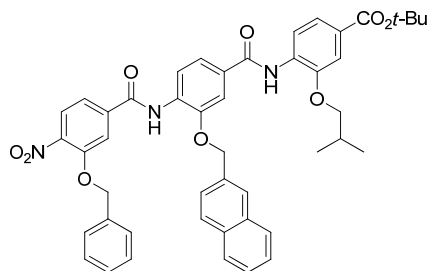

O<sub>2</sub>N-[Phe]-[Nap]-[Leu]-OtBu. <sup>1</sup>H NMR (500 MHz, CDCl<sub>3</sub>, 25 °C) δ 8.85 (s, 1H), 8.77 (s, 1H), 8.65 (d, *J* = 8.5 Hz, 1H), 8.59 (d, *J* = 8.5 Hz, 1H), 7.89 (s, 1H), 7.87 (d, *J* = 8.5 Hz, 1H), 7.81 (m, 3H), 7.73 (d, *J* = 8.5 Hz, 1H), 7.67 (d, *J* = 8.5 Hz, 1H), 7.63 (s, 1H), 7.51 (m, 5H), 7.35 (m, 5H), 7.25 (m, 1H), 5.37 (s, 2H), 5.10 (s, 2H), 3.92 (d, *J* = 6.5 Hz, 2H), 2.21 (m, 1H), 1.61 (s, 9H), 1.12 (d, *J* = 6.5 Hz, 6H); HRMS-ESI (*m/z*) calcd for [C<sub>47</sub>H<sub>45</sub>N<sub>3</sub>O<sub>9</sub>+H]<sup>+</sup> 796.3228; found: 796.3222.

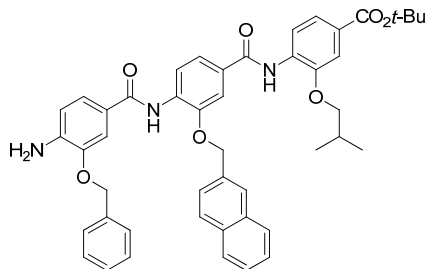

H<sub>2</sub>N-[Phe]-[Nap]-[Leu]-OtBu. <sup>1</sup>H NMR (500 MHz, CD<sub>2</sub>Cl<sub>2</sub>-CD<sub>3</sub>OD (1:1), 25 °C) δ 8.79 (d, *J* = 8.5 Hz, 1H), 8.67 (d, *J* = 8.5 Hz, 1H), 8.20 (s, 1H), 8.09 (m, 2H), 7.99 (m, 2H), 7.86 (t, *J* = 7.0 Hz, 2H), 7.77 (m, 2H), 7.70 (m, 2H), 7.62 (s, 1H), 7.56 (m, 6H), 7.07 (d, *J* = 8.5 Hz, 1H), 5.67 (s, 2H), 5.17 (s, 2H), 4.17 (d, *J* = 6.5 Hz, 2H), 2.44 (m, 1H), 1.82 (s, 9H), 1.34 (d, *J* = 6.5 Hz, 6H); HRMS-ESI (*m/z*) calcd for [C<sub>47</sub>H<sub>47</sub>N<sub>3</sub>O<sub>7</sub>+H]<sup>+</sup> 766.3487; found: 766.3479.

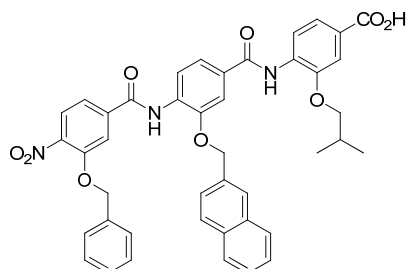

O<sub>2</sub>N-[Phe]-[Nap]-[Leu]-OH. <sup>1</sup>H NMR (500 MHz, DMSO-*d*<sub>6</sub>, 25 °C) δ 12.93 (s, 1H), 10.08 (s, 1H), 9.51 (s, 1H), 8.04 (m, 3H), 7.97 (m, 2H), 7.91 (d, *J* = 8.5 Hz), 7.86 (m, 1H), 7.81 (m, 2H), 7.66 (m, 4H), 7.57 (s, 1H), 7.48 (m, 2H), 7.37 (m, 5H), 5.48 (s, 2H), 5.33 (s, 2H), 3.90 (d, *J* = 6.5 Hz, 2H), 2.09 (m, 1H), 0.99 (d, *J* = 6.5 Hz, 6H); HRMS-ESI (*m/z*) calcd for [C<sub>43</sub>H<sub>37</sub>N<sub>3</sub>O<sub>9</sub>+Na]<sup>+</sup> 762.2422; found: 762.2419.

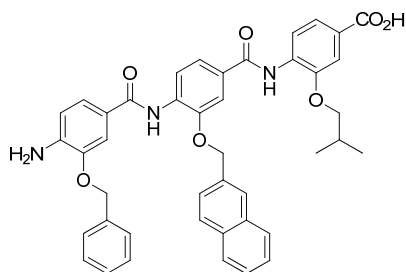

H<sub>2</sub>N-[Phe]-[Nap]-[Leu]-OH. <sup>1</sup>H NMR (600 MHz, CD<sub>2</sub>Cl<sub>2</sub>-CD<sub>3</sub>OD (1:1), 25 °C) δ 8.72 (d, *J* = 7.2 Hz, 1H), 8.67 (d, *J* = 7.8 Hz, 1H), 8.18 (s, 1H), 8.05 (m, 2H), 7.97 (s, 2H), 7.91 (d, *J* = 7.8 Hz, 1H), 7.67 (m, 10H), 7.43 (s, 1H), 5.66 (s, 2H), 5.25 (s, 2H), 4.15 (d, *J* = 5.4 Hz, 2H), 2.41 (m, 1H), 1.31 (d, *J* = 6.6 Hz, 6H); HRMS-ESI (*m/z*) calcd for [C<sub>43</sub>H<sub>39</sub>N<sub>3</sub>O<sub>7</sub>+H]<sup>+</sup> 710.2861; found: 710.2855.

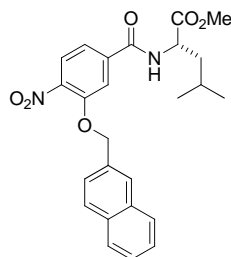

O<sub>2</sub>N-[Nap]-Leu-OMe. <sup>1</sup>H NMR (400 MHz, CDCl<sub>3</sub>, 25 °C) δ 7.87 (s, 1H), 7.79 (m, 4H), 7.63 (s, 1H), 7.50 (d, *J* = 8.4 Hz, 1H), 7.45 (m, 2H), 7.34 (d, *J* = 7.2 Hz, 1H), 7.23 (d, *J* = 8.0 Hz, 1H), 5.32 (m, 2H), 4.84 (m, 1H), 3.79 (s, 3H), 1.71 (m, 3H), 0.97 (d, *J* = 6.0 Hz, 6H); HRMS-ESI (*m/z*) calcd for [C<sub>25</sub>H<sub>26</sub>N<sub>2</sub>O<sub>6</sub>+H]<sup>+</sup> 451.1864; found: 451.1851.

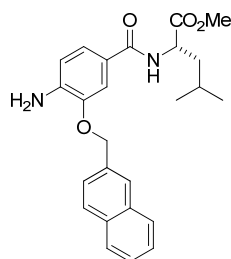

H<sub>2</sub>N-[Nap]-Leu-OMe. <sup>1</sup>H NMR (500 MHz, CDCl<sub>3</sub>, 25 °C) δ 7.85 (m, 4H), 7.50 (m, 4H), 7.23 (d, *J* = 8.0 Hz, 1H), 6.68 (d, *J* = 8.0 Hz, 1H), 6.61 (d, *J* = 8.0 Hz, 1H), 5.21 (s, 2H), 4.85 (m, 1H), 4.20 (s, 2H), 3.74 (s, 3H), 1.68 (m, 3H), 0.97 (t, *J* = 6.5 Hz, 6H); HRMS-ESI (*m/z*) calcd for [C<sub>25</sub>H<sub>28</sub>N<sub>2</sub>O<sub>4</sub>+H]<sup>+</sup> 421.2122; found: 421.2126.

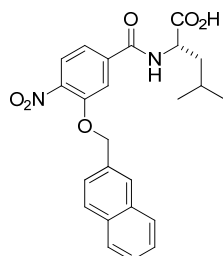

O<sub>2</sub>N-[Nap]-Leu-OH. <sup>1</sup>H NMR (400 MHz, acetone-*d*<sub>6</sub>, 25 °C) δ 8.12 (d, *J* = 8.0 Hz, 1H), 8.06 (s, 1H), 7.94 (m, 5H), 7.66 (d, *J* = 8.4 Hz, 2H), 7.54 (m, 2H), 5.57 (s, 2H), 4.74 (m, 1H), 1.79 (m, 3H), 0.97 (t, *J* = 6.0 Hz, 6H); HRMS-ESI (*m/z*) calcd for [C<sub>24</sub>H<sub>24</sub>N<sub>2</sub>O<sub>6</sub>-H]<sup>-</sup> 435.1562; found: 435.1553.

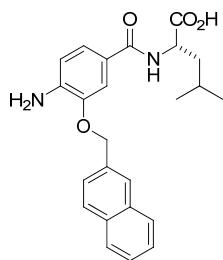

H<sub>2</sub>N-[Nap]-Leu-OH. <sup>1</sup>H NMR (600 MHz, DMSO-*d*<sub>6</sub>, 25 °C) δ 12.52 (s, 1H), 8.15 (d, *J* = 7.8 Hz, 1H), 8.07 (s, 1H), 7.94 (m, 3H), 7.65 (d, *J* = 8.4 Hz, 1H), 7.53 (m, 3H), 7.37 (d, *J* = 8.4 Hz, 1H), 6.69 (d, *J* = 8.4 Hz, 1H), 5.32 (s, 2H), 4.41 (m, 1H), 3.17 (s, 2H), 1.75 (m, 1H), 1.67 (m, 1H), 1.56 (m, 1H), 0.92 (d, *J* = 6.6 Hz, 3H), 0.85 (d, *J* = 6.6 Hz, 3H); HRMS-ESI (*m/z*) calcd for [C<sub>24</sub>H<sub>26</sub>N<sub>2</sub>O<sub>4</sub>+H]<sup>+</sup> 407.1965; found: 407.1974.

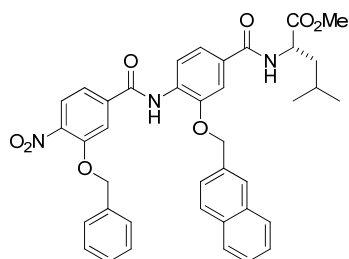

O<sub>2</sub>N-[Phe]-[Nap]-Leu-OMe. <sup>1</sup>H NMR (500 MHz, CDCl<sub>3</sub>, 25 °C) δ 8.70 (s, 1H), 8.52 (d, *J* = 8.0 Hz, 1H), 7.82 (m, 2H), 7.77 (m, 2H), 7.67 (s, 2H), 7.59 (s, 1H), 7.48 (m, 3H), 7.42 (d, *J* = 8.5 Hz, 1H), 7.34 (m, 5H), 7.19 (d, *J* = 8.0 Hz, 1H), 6.87 (s, 1H), 5.29 (s, 2H), 5.06 (s, 2H), 4.88 (m, 1H), 3.79 (s, 3H), 1.75 (m, 3H), 1.01 (t, *J* = 5.5 Hz, 6H); HRMS-ESI (*m/z*) calcd for [C<sub>39</sub>H<sub>37</sub>N<sub>3</sub>O<sub>8</sub>+H]<sup>+</sup> 676.2653; found: 676.2630.

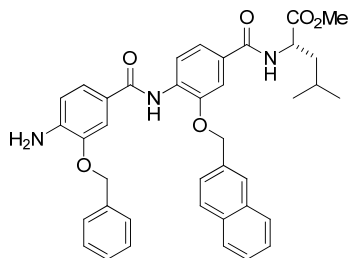

H<sub>2</sub>N-[Phe]-[Nap]-Leu-OMe. <sup>1</sup>H NMR (500 MHz, DMSO-*d*<sub>6</sub>, 25 °C) δ 9.19 (s, 1H), 8.68 (d, *J* = 7.5 Hz, 1H), 8.11 (m, 2H), 7.91 (d, *J* = 8.0 Hz, 1H), 7.86 (m, 2H), 7.72 (s, 2H), 7.59 (d, *J* = 8.0 Hz, 1H), 7.50 (m, 3H), 7.39 (m, 5H), 7.32 (d, *J* = 7.0 Hz, 1H), 6.69 (d, *J* = 8.5 Hz, 1H), 5.52 (s, 2H), 5.45 (s, 2H), 5.07 (s, 2H), 4.51 (m, 1H), 3.65 (s, 3H), 1.80 (m, 1H), 1.69 (m, 1H), 1.60 (m, 1H), 0.94 (d, *J* = 6.5 Hz, 3H), 0.87 (d, *J* = 6.5 Hz, 3H); HRMS-ESI (*m/z*) calcd for [C<sub>39</sub>H<sub>39</sub>N<sub>3</sub>O<sub>6</sub>+H]<sup>+</sup> 646.2911; found: 646.2904.

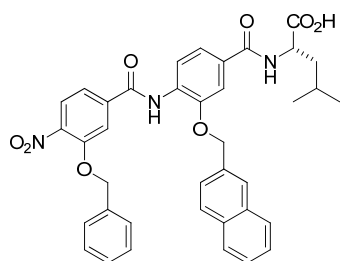

O<sub>2</sub>N-[Phe]-[Nap]-Leu-OH. <sup>1</sup>H NMR (600 MHz, DMSO-*d*<sub>6</sub>, 25 °C) δ 12.59 (s, 1H), 10.02 (s, 1H), 8.62 (d, *J* = 7.8 Hz, 1H), 8.04 (m, 2H), 7.96 (s, 1H), 7.87 (m, 3H), 7.79 (m, 1H), 7.75 (s, 1H), 7.70 (d, *J* = 9.0 Hz, 1H), 7.68 (d, *J* = 8.4 Hz, 1H), 7.61 (d, *J* = 8.4 Hz, 1H), 7.48 (m, 2H), 7.40 (m, 4H), 7.35 (m, 1H), 5.45 (s, 2H), 5.32 (s, 2H), 4.46 (m, 1H), 1.79 (m, 1H), 1.70 (m, 1H), 1.61 (m, 1H), 0.94 (d, *J* = 6.6 Hz, 3H), 0.87 (d, *J* = 6.6 Hz, 3H); HRMS-ESI (*m/z*) calcd for [C<sub>38</sub>H<sub>35</sub>N<sub>3</sub>O<sub>8</sub>+H]<sup>+</sup> 662.2497; found: 662.2494.

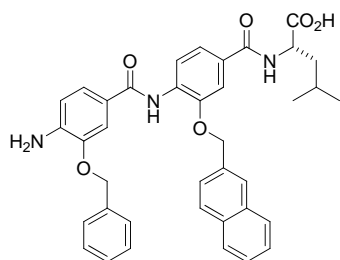

H<sub>2</sub>N-[Phe]-[Nap]-Leu-OH. <sup>1</sup>H NMR (600 MHz, DMSO-*d*<sub>6</sub>, 25 °C) δ 12.57 (s, 1H), 9.18 (s, 1H), 8.55 (d, *J* = 7.8 Hz, 1H), 8.11 (m, 2H), 7.91 (d, *J* = 8.4 Hz, 1H), 7.86 (m, 2H), 7.72 (m, 2H), 7.59 (d, *J* = 8.4 Hz, 1H), 7.50 (m, 2H), 7.47 (s, 1H), 7.39 (m, 5H), 7.32 (d, *J* = 7.2 Hz, 1H), 6.69 (d, *J* = 8.4 Hz, 1H), 5.51 (s, 2H), 5.45 (s, 2H), 5.07 (s, 2H), 4.46 (m, 1H), 1.79 (m, 1H), 1.71 (m, 1H), 1.61 (m, 1H), 0.94 (d, *J* = 6.6 Hz, 3H), 0.87 (d, *J* = 6.6 Hz, 3H); HRMS-ESI (*m/z*) calcd for [C<sub>38</sub>H<sub>37</sub>N<sub>3</sub>O<sub>6</sub>+H]<sup>+</sup> 632.2755;

found: 632.2757.

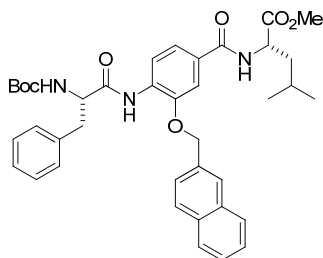

Boc-Phe-[Nap]-Leu-OMe.  $^1\text{H NMR}$  (500 MHz,  $\text{CDCl}_3$ , 25 °C)  $\delta$  8.51 (s, 1H), 8.39 (d,  $J = 7.5$  Hz, 1H), 7.85 (m, 3H), 7.80 (s, 1H), 7.53 (s, 1H), 7.50 (m, 2H), 7.41 (d,  $J = 8.0$  Hz, 1H), 7.32 (d,  $J = 8.5$  Hz, 1H), 7.17 (m, 5H), 6.91 (s, 1H), 5.16 (m, 2H), 5.05 (s, 1H), 4.85 (m, 1H), 4.54 (s, 1H), 3.60 (s, 3H), 3.13 (m, 1H), 3.04 (m, 1H), 1.70 (m, 3H), 1.28 (s, 9H), 0.95 (d,  $J = 6.0$  Hz, 3H), 0.94 (d,  $J = 6.0$  Hz, 3H); HRMS-ESI ( $m/z$ ) calcd for  $[\text{C}_{39}\text{H}_{45}\text{N}_3\text{O}_7+\text{H}]^+$  668.3330; found: 668.3308.

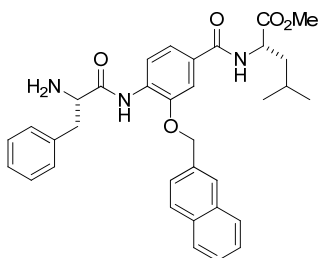

$\text{H}_2\text{N}$ -Phe-[Nap]-Leu-OMe.  $^1\text{H NMR}$  (600 MHz,  $\text{DMSO}-d_6$ , 25 °C)  $\delta$  9.97 (s, 1H), 8.68 (d,  $J = 7.8$  Hz, 1H), 8.35 (s, 2H), 8.04 (s, 1H), 7.93 (m, 2H), 7.87 (m, 1H), 7.66 (s, 1H), 7.60 (d,  $J = 7.8$  Hz, 1H), 7.53 (m, 2H), 7.29 (m, 5H), 5.46 (m, 2H), 4.49 (m, 2H), 3.63 (s, 3H), 3.37 (3H, overlapped with  $\text{H}_2\text{O}$  peak in DMSO), 3.19 (m, 1H), 3.10 (m, 1H), 1.78 (m, 1H), 1.65 (m, 1H), 1.58 (m, 1H), 0.91 (d,  $J = 6.6$  Hz, 3H), 0.84 (d,  $J = 6.6$  Hz, 3H); HRMS-ESI ( $m/z$ ) calcd for  $[\text{C}_{34}\text{H}_{37}\text{N}_3\text{O}_5+\text{H}]^+$  568.2806; found: 568.2805.

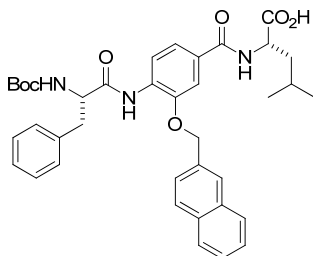

Boc-Phe-[Nap]-Leu-OH.  $^1\text{H NMR}$  (500 MHz,  $\text{acetone}-d_6$ , 25 °C)  $\delta$  9.17 (s, 1H), 8.48 (d,  $J = 8.5$  Hz, 1H), 8.05 (s, 1H), 7.93 (m, 3H), 7.83 (d,  $J = 8.5$  Hz, 1H), 7.75 (s, 1H), 7.66 (d,  $J = 8.0$  Hz, 1H), 7.60 (d,  $J = 8.0$  Hz, 1H), 7.52 (m, 2H), 7.27 (m, 4H), 7.20 (d,  $J = 7.0$  Hz, 1H), 6.48 (s, 1H), 5.41 (s, 2H), 4.74 (m, 1H), 4.55 (s, 1H), 3.32 (m, 1H), 3.03 (m, 1H), 1.83 (m, 3H), 1.21 (s, 9H), 0.96 (t,  $J = 6.5$  Hz, 6H); HRMS-ESI ( $m/z$ ) calcd for  $[\text{C}_{38}\text{H}_{43}\text{N}_3\text{O}_7+\text{H}]^+$  654.3174; found: 654.3188.

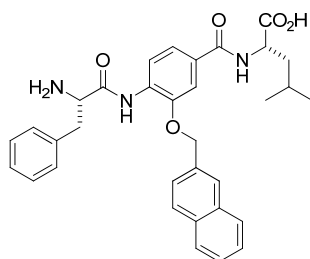

H<sub>2</sub>N-Phe-[Nap]-Leu-OH. <sup>1</sup>H NMR (600 MHz, DMSO-*d*<sub>6</sub>, 25 °C) δ 12.56 (s, 1H), 9.93 (s, 1H), 8.52 (d, *J* = 7.8 Hz, 1H), 8.31 (s, 2H), 8.02 (s, 1H), 7.91 (m, 2H), 7.85 (m, 1H), 7.65 (s, 1H), 7.58 (d, *J* = 8.4 Hz, 1H), 7.51 (m, 2H), 7.27 (m, 5H), 5.44 (m, 2H), 4.49 (s, 1H), 4.40 (m, 1H), 3.36 (3H, overlapped with H<sub>2</sub>O peak in DMSO), 3.17 (m, 1H), 3.07 (m, 1H), 1.74 (m, 1H), 1.63 (m, 1H), 1.56 (m, 1H), 0.89 (d, *J* = 6.0 Hz, 3H), 0.81 (d, *J* = 6.6 Hz, 3H); HRMS-ESI (*m/z*) calcd for [C<sub>33</sub>H<sub>35</sub>N<sub>3</sub>O<sub>5</sub>+H]<sup>+</sup> 554.2649; found: 554.2642.

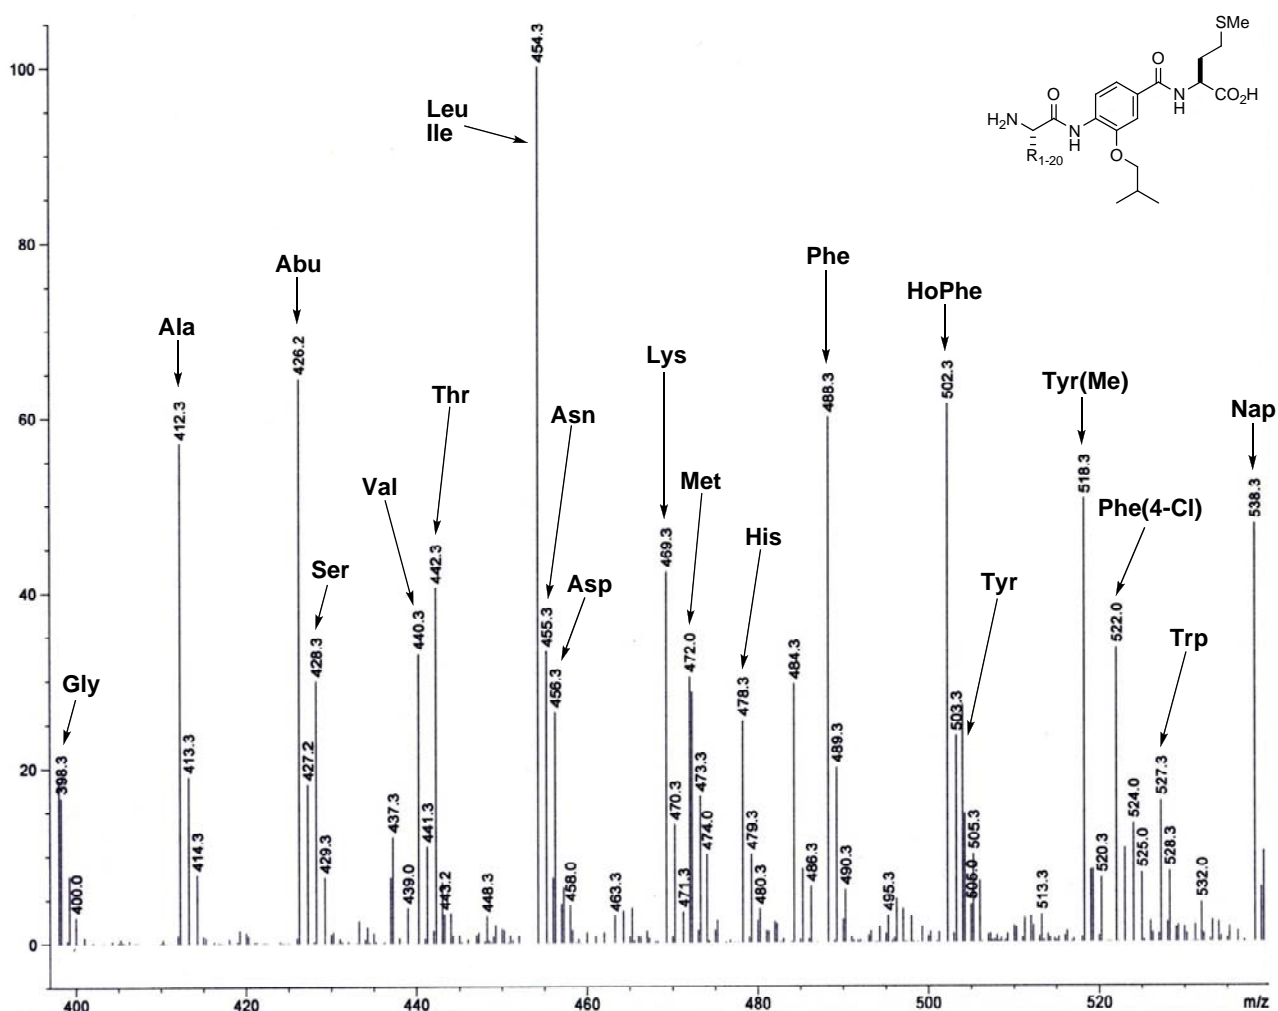

Figure S3. MS detection of all 20 compounds in a mixture of 20 trimers.

**MDM2/p53 Binding Assay** A streptavidin-coated 96 well plate (ReactiBind™ Streptavidin High Binding Capacity coated plate, Pierce) was rinsed with wash buffer (PBS + 0.05% Tween-20, 3x) and incubated with 100 µL per well of biotinylated SGSG-p53 peptide (17–27, 50 nM in wash buffer) at 4 °C for 1 h. Unbound peptide was then removed by rinsing with wash buffer (3x). In a separate 96 well polypropylene plate (Pierce), 50 µL of MDM2 (4 nM, EMD Bioscience) was incubated with 50 µL of inhibitor (a range of concentrations) at 4 °C for 30 min in a Wallac assay buffer (Perkin Elmer, Product No. 1244-111). The MDM2/inhibitor mixtures (100 µL) were then transferred to a well in the streptavidin-coated plate and then left to incubate at 4 °C for 1 h. The wells were then washed with wash buffer (5x), followed by the addition of 100 µL of anti-MDM2 [(Ab-6) mouse mAb(5B10C)] (EMD Bioscience), diluted 500-fold with a dilution buffer (PBS + 0.05% Tween-20 + 1% bovine serum albumin). After 2 h at 4 °C, the wells were washed with wash buffer (5x) and a solution of anti-mouse IgG horseradish peroxidase conjugate (Jackson Immunochemical), diluted in dilution buffer (1 µg/mL), was added. The wells were incubated at 4 °C for 1 h before being washed with wash buffer (5x). A 100 µL solution of peroxidase substrate, 3,3',5',5-tetramethylbenzidine (Sigma-Aldrich), was added and the reaction was allowed to incubate at room temperature for 30 min to develop a blue product. Quenching the reaction with 100 µL of aqueous HCl (0.15 N) produces a yellow color which can be read at 450 nm. The percentage of p53/MDM2 binding was calculated from which the IC<sub>50</sub> values for the analogues were determined. The assay was performed in triplicate using a blank which does not contain SGSG-p53 peptide as a negative control.

Full citation for references 21c and 21f:

21(c) Koblisch, H. K.; Zhao, S.; Franks, C. F.; Donatelli, R. R.; Tominovich, R. M.; LaFrance, L. V.; Leonard, K. A.; Gushue, J. M.; Parks, D. J.; Calvo, R. R.; Milkiewicz, K. L.; Marugán, J. J.; Raboisson, P.; Cummings, M. D.; Grasberger, B. L.; Johnson, D. L.; Lu, T.; Molloy, C. J.; Maroney, A. C. *Mol. Cancer Ther.* **2006**, *5*, 160-169.

21(f) Grasberger, B. L.; Lu, T.; Schubert, C.; Parks, D. J.; Carver, T. E.; Koblisch, H. K.; Cummings, M. D.; LaFrance, L. V.; Milkiewicz, K. L.; Calvo, R. R.; Maguire, D.; Lattanze, J.; Franks, C. F.; Zhao, S.; Ramachandren, K.; Bylebyl, G. R.; Zhang, M.; Manthey, C. L.; Petrella, E. C.; Pantoliano, M. W.; Deckman, I. C.; Spurlino, J. C.; Maroney, A. C.; Tomczuk, B. E.; Molloy, C. J.; Bone, R. F. *J. Med. Chem.* **2005**, *48*, 909-912.
